# Supplementary material for: Genome-wide identification and expression pattern analysis of quinoa BBX family
Source: PeerJ. 2022 Dec 5;10:e14463. doi: 10.7717/peerj.14463 (PMC9745916; doi:10.7717/peerj.14463)
Supplement: Data S1 [file peerj-10-14463-s007.xlsx]

## Sheet: BBX
	CK	3T	6T	9T	12T	24T	48T	3N	6N	9N	12N	24N	48N	3P	6P	9P	12P	24P	48P
CqBBX01	20.48	20.18	22.77	22.44	22.06	21.12	20.88	20.67	23.97	25.92	25.3	21.54	20.03	21.12	21.16	21.85	21.51	19.73	20.35
CqBBX01	20.51	20.31	22.57	22.45	22.05	21.73	20.75	20.6	23.36	25.29	25.25	21.93	20.03	21.02	21.51	21.69	21.99	19.79	20.13
CqBBX01	20.66	20.47	22.65	22.35	22.05	21.2	20.56	20.55	23.37	25.31	25.76	21.63	20.13	21.15	21.29	21.27	21.24	19.59	20.88
CqBBX05	20.2	20.25	20.44	21.29	22.03	20.95	20.57	21.39	22.16	25.47	26.46	20.45	21.26	21.58	22.35	22.27	21.67	21.52	22.47
CqBBX05	20.64	20.29	20.15	21.16	22.13	20.43	20.47	21.44	22.27	25.45	26.27	20.53	21.42	21.84	22.08	22.99	21.17	21.39	22.8
CqBBX05	20.84	20.44	20.25	21.33	22.2	20.34	20.18	21.44	22.39	25.3	26.35	20.61	21.5	21.28	22.41	22.91	21.35	21.13	22.5
CqBBX06	27.97	26.99	26.24	26.57	27.71	26.22	26.74	26.37	26	27.66	29.82	26.48	27.9	27.22	26.28	26.39	26.16	25.86	25.37
CqBBX06	27.59	26.4	26.77	26.89	27.29	26.95	26.92	26.48	26.1	27.89	29.15	26.72	27.82	27.2	26.54	26.65	26.42	25.93	25.17
CqBBX06	27.85	26.33	26.67	26.55	27.24	26.25	26.85	26.76	26.09	27.75	29.87	26.5	27.92	27.11	26.55	26.33	26.06	25.96	25.34
CqBBX13	30.7	33.37	33.64	32.63	33.69	31.45	31.29	31.8	28.64	30.74	30.51	28.93	28.12	27.79	27.29	27.99	26.81	26.73	23.67
CqBBX13	30.62	33.87	33.69	32.55	33.24	31.34	31.31	31.75	28.17	30.64	30.06	28.72	28.43	27.35	27.88	27.87	26.65	26.69	23.56
CqBBX13	30.74	33.14	33.51	32.45	33.35	31.35	31.24	31.55	28.99	30.75	30.23	28.64	28.5	27.77	27.12	27.53	26.45	26.55	23.51
CqBBX18	29.25	29.61	28.44	27.25	29.11	30.25	31.04	29.2	27.26	28.49	30.48	28.34	29.01	28.98	27.16	26.36	26.56	25.77	23.71
CqBBX18	29.35	29.45	28.35	27.45	29.45	30.15	31.22	29.11	27.45	28.43	30.54	28.27	29.17	28.88	27.41	26.56	26.33	25.46	23.89
CqBBX18	29.34	29.36	28.45	27.44	29.32	30.22	31.15	29.35	27.73	28.51	30.42	28.19	29.08	28.9	27.72	26.58	26.45	25.55	23.54
CqBBX19	28.64	26.72	27.73	30.33	31.07	26.61	28.3	27.37	27.56	27.53	30.19	27.02	28.32	28.12	27.01	25.21	26.62	26.52	24.36
CqBBX19	28.75	26.79	27.45	30.38	31.11	26.76	28.71	27.46	27.26	27.45	30.36	27.25	28.46	28.52	27.17	25.9	26.86	26.18	24.51
CqBBX19	28.71	26.75	27.71	30.45	31.12	26.51	28.26	27.26	27.51	27.03	30.25	27.58	28.41	28.82	27.17	25.51	26.72	26.3	24.75
CqBBX20	31.53	30.25	29.16	28.17	28.61	29.36	30.11	29.73	29.21	29.84	30.27	31.98	32.11	29.86	30.05	31.16	29.41	31.16	31.42
CqBBX20	31.04	30.01	29.37	28.35	28.56	29.55	30.45	29.63	29.77	29.79	30.15	31.2	32.11	29.75	30.09	31.18	29.35	31.75	31.28
CqBBX20	31.28	30.15	29.25	28.35	28.32	29.45	30.35	29.59	29.13	29.85	30.19	31.68	32.46	29.64	30.19	31.23	29.44	31	31.48
CqBBX21	30.55	28.96	30.85	31.21	30.01	30.14	30.89	29.02	26.79	28.15	30.6	24.52	26.74	26.95	27.78	27.26	26.51	25.6	28.98
CqBBX21	30.45	28.75	30.57	31.12	30.21	30.15	30.91	29.12	26.99	28.21	30.31	24.76	26.46	26.88	27.09	27.72	26.65	25.12	28.02
CqBBX21	30.64	28.88	30.31	31.14	30.11	30.21	30.85	29.11	26.85	28.27	30.47	24.48	26.16	26.81	27.83	27.41	26.81	25.73	28.55
CqBBX23	27.41	25.89	25.27	26.4	27.73	26.41	26.24	27.64	28.29	29.65	30.41	25.65	27.16	26.68	28.45	28.27	29.31	26.77	25.81
CqBBX23	27.33	25.26	25.09	26.33	27.84	26.32	26.86	27.46	28.02	29.76	30.73	25.84	27.07	26.11	28.74	28.68	29.65	26.84	25.59
CqBBX23	27.36	25.79	25.01	26.46	27.74	26.04	26.67	27.33	29.04	29.85	30.69	25.4	27.52	26.79	28.29	28.7	29.33	26.28	25.75
CqBBX26	25.1	24.61	25.31	26.15	26.47	26.98	25.25	25.65	25.79	25.26	24.87	24.33	24.29	24.43	24.12	24.63	24.64	23.45	23.89
CqBBX26	25.32	24.63	25.17	26.41	26.34	26.45	25.05	25.47	25.17	25.58	24.62	24.74	24.27	24.48	24.26	24.43	24.33	23.88	23.85
CqBBX26	25.49	24.73	25.45	26.02	26.89	26.21	25.32	25.01	25.62	25.35	24.56	24.23	24.31	24.43	24.28	24.54	24.3	23.4	23.33
CqBBX28	30.04	28.8	29.92	30.61	31.94	31.47	32.89	29.34	30.55	31.17	31.22	30.77	28.13	28.33	28.53	28.43	29.64	25.68	26.98
CqBBX28	30.14	28.54	29.63	30.55	31.55	31.35	32.45	29.65	30.34	31.23	31.14	30.29	28.03	28.45	28.51	28.52	29.79	25.97	26.35
CqBBX28	30.54	28.83	29.86	30.57	31.44	31.27	32.41	29.38	30.41	31.04	31.5	30.66	28.48	28.52	28.61	28.63	29.03	25.32	26.45
CqBBX30	30.25	29.55	28.36	29.11	30.12	31.98	31.73	29.28	30.03	31.92	30.86	30.69	31.42	32.03	33.69	32.41	30.08	30.8	28.97
CqBBX30	30.15	29.45	28.55	29.34	30.11	31.43	31.58	29.45	30.65	31.42	30.43	30.89	31.55	32.96	33.37	32.57	30.49	30.71	28.62
CqBBX30	30.22	29.35	28.75	29.31	30.55	31.45	31.22	29.49	30.93	31.25	30.95	30.94	31.49	32.94	33.16	32.38	30.35	30.44	28.75
CqBBX31	28.76	24.52	26.05	28	25.92	26.34	27.21	28.5	26.81	32.64	31.51	30.71	27.95	27.58	26.63	27.46	27.55	24.97	26.76
CqBBX31	28.52	24.72	26.46	28.01	25.88	26.75	27.31	28.95	26.95	32.21	31.97	30.26	27.65	27.04	26.22	27.55	27.45	24.99	26.86
CqBBX31	28.68	24.64	26.35	28.11	25.86	26.42	27.43	28.28	26.85	32.75	31.85	30.94	27.51	27.7	26.35	27.43	27.58	24.49	26.81
内参1	19.35	21.59	21.9	23.46	21.6	22.46	22.88	22.91	23.83	24.53	23.01	22.65	20.98	21.17	22.06	19.69	21.8	21.99	22.65
内参2	19.34	21.77	21.3	23.61	21.25	22.67	22.46	22.94	23.63	24.67	23.21	22.46	20.78	21.33	22.36	19.59	21.72	21.82	22.62
内参3	19.69	21.83	21.4	23.53	21.67	22.35	22.42	22.98	23.63	24.51	23.11	22.77	20.99	21.69	22.04	18.95	21.95	21.95	22.53
