# Supplementary material for: Genome-wide identification and expression pattern analysis of quinoa BBX family
Source: PeerJ. 2022 Dec 5;10:e14463. doi: 10.7717/peerj.14463 (PMC9745916; doi:10.7717/peerj.14463)
Supplement: Table S1 [file peerj-10-14463-s001.xlsx]

## Sheet: Sheet1
	S1 The primer was designed for qRT-PCR
Gene ID	Gene	F	R	Size
	CqBBX01	CCTCGTCTTGGGCTGTTGAT	CATGAGGAATTTGCTCGCCG	132
	CqBBX05	AAAATGCACCACAAGTCGCC	CATGAGGAATTTGCTCGCCG	192
AUR62010390-RA	CqBBX06	AGGCTGATAGTGGCAAGCTC	CTGGGGCACTGTCCAAGAAA	119
AUR62016828-RA	CqBBX13	CATGCCAACAAACTCGCCTC	CTGGCAAATGTCGCAGAGTG	87
AUR62010415-RA	CqBBX18	GCAACAGCAGCCCAGATAGT	TGCCACCCTGGTAGCATATC	100
AUR62014436-RA	CqBBX19	TCAAAGGCTGACAGTGGCAA	CTGGGGCACTGTCCAAGAAA	123
AUR62016801-RA	CqBBX20	GAAGCAGCACTTTGTGAAGGG	ACCAAATCCACCCATACTTTCCT	198
AUR62034563-RA	CqBBX21	TTGCCGTGCTTGTGATGAGA	CATTGCAGGCAAAGCGAACT	165
AUR62019649-RA	CqBBX23	ACTTCTTCTAGACACGCCGC	TCCTCTTCGTCCCCATCCAA	122
AUR62039579-RA	CqBBX26	GAGGAACAGTACGGTGGTGG	AATTGCCACCCAAAACGACG	196
AUR62023859-RA	CqBBX28	GTCGAGATTGCTCTCCTCCG	TACATCCGCCATCTTCGCTC	176
AUR62002328-RA	CqBBX30	ATAAGGTGCACCATGCCAAC	TTTCTGAACCAAATCCACCCA	177
AUR62001354-RA	CqBBX31	CCCCGAATGCTGTACCGAAA	CATTGCAGGCAAAGCGAACT	91
AUR62025650-RA
AUR62041163-RA
