# Supplementary material for: Genome-wide identification and expression pattern analysis of quinoa BBX family
Source: PeerJ. 2022 Dec 5;10:e14463. doi: 10.7717/peerj.14463 (PMC9745916; doi:10.7717/peerj.14463)
Supplement: Table S2 [file peerj-10-14463-s002.xlsx]

## Sheet: Sheet1
Table S2 Information of 120 BBX genes in this study
Gene ID	Gene Name
AUR62023859-RA	CqBBX01
AUR62035217-RA	CqBBX02
AUR62035221-RA	CqBBX03
AUR62041089-RA	CqBBX04
AUR62002328-RA	CqBBX05
AUR62019649-RA	CqBBX06
AUR62030805-RA	CqBBX07
AUR62040293-RA	CqBBX08
AUR62037849-RA	CqBBX09
AUR62009440-RA	CqBBX10
AUR62023118-RA	CqBBX11
AUR62037140-RA	CqBBX12
AUR62034563-RA	CqBBX13
AUR62034638-RA	CqBBX14
AUR62020307-RA	CqBBX15
AUR62002867-RA	CqBBX16
AUR62002793-RA	CqBBX17
AUR62014436-RA	CqBBX18
AUR62039579-RA	CqBBX19
AUR62016801-RA	CqBBX20
AUR62016828-RA	CqBBX21
AUR62014102-RA	CqBBX22
AUR62041163-RA	CqBBX23
AUR62025058-RA	CqBBX24
AUR62039984-RA	CqBBX25
AUR62001354-RA	CqBBX26
AUR62008578-RA	CqBBX27
AUR62025650-RA	CqBBX28
AUR62030486-RA	CqBBX29
AUR62010415-RA	CqBBX30
AUR62010390-RA	CqBBX31
GLYMA_07G020400	GmBBX01
GLYMA_08G221600	GmBBX02
GLYMA_12G198400	GmBBX03
GLYMA_12G103800	GmBBX04
GLYMA_15G065900	GmBBX05
GLYMA_13G248000	GmBBX06
GLYMA_06G300900	GmBBX07
GLYMA_13G303700	GmBBX08
GLYMA_10G269400	GmBBX09
GLYMA_06G059600	GmBBX10
GLYMA_06G255300	GmBBX11
GLYMA_19G039000	GmBBX12
GLYMA_13G050300	GmBBX13
GLYMA_03G209800	GmBBX14
GLYMA_19G207100	GmBBX15
GLYMA_20G121700	GmBBX16
GLYMA_04G058900	GmBBX17
GLYMA_02G223700	GmBBX18
GLYMA_01G168500	GmBBX19
GLYMA_02G152900	GmBBX20
GLYMA_10G021400	GmBBX21
GLYMA_11G074900	GmBBX22
GLYMA_11G110900	GmBBX23
GLYMA_13G009300	GmBBX24
GLYMA_13G093800	GmBBX25
GLYMA_14G190400	GmBBX26
GLYMA_16G050900	GmBBX27
GLYMA_17G066600	GmBBX28
GLYMA_19G099700	GmBBX29
GLYMA_20G060400	GmBBX30
GLYMA_12G196200	GmBBX31
GLYMA_13G306300	GmBBX32
VIT_01s0011g03520	VvBBX01
VIT_01s0011g04240	VvBBX02
VIT_01s0146g00360	VvBBX03
VIT_03s0038g00340	VvBBX04
VIT_03s0038g00690	VvBBX05
VIT_04s0008g07340	VvBBX06
VIT_04s0023g03030	VvBBX07
VIT_05s0102g00750	VvBBX08
VIT_07s0104g01360	VvBBX09
VIT_09s0054g00530	VvBBX10
VIT_11s0052g01800	VvBBX11
VIT_12s0059g02500	VvBBX12
VIT_12s0059g02510	VvBBX13
VIT_12s0134g00400	VvBBX14
VIT_12s0057g01350	VvBBX15
VIT_14s0083g00640	VvBBX16
VIT_14s0068g01380	VvBBX17
VIT_18s0001g13520	VvBBX18
VIT_18s0089g01280	VvBBX19
VIT_19s0014g00350	VvBBX20
VIT_19s0014g03960	VvBBX21
VIT_19s0014g05120	VvBBX22
VIT_00s0194g00070	VvBBX23
VIT_00s0203g00210	VvBBX24
VIT_00s0347g00030	VvBBX25
AT5G15840.1	AtBBX01
AT5G15850.1	AtBBX02
AT3G02380.1	AtBBX03
AT2G24790.1	AtBBX04
AT5G24930.1	AtBBX05
AT5G57660.1	AtBBX06
AT3G07650.1	AtBBX07
AT5G48250.1	AtBBX08
AT4G15250.1	AtBBX09
AT3G21880.1	AtBBX10
AT2G47890.1	AtBBX11
AT2G33500.1	AtBBX12
AT1G28050.1	AtBBX13
AT1G68520.1	AtBBX14
AT1G25440.1	AtBBX15
AT1G73870.1	AtBBX16
AT1G49130.1	AtBBX17
AT2G21320.1	AtBBX18
AT4G38960.3	AtBBX19
AT4G39070.1	AtBBX20
AT1G75540.1	AtBBX21
AT1G78600.2	AtBBX22
AT4G10240.1	AtBBX23
AT1G06040.1	AtBBX24
AT2G31380.1	AtBBX25
AT1G60250.1	AtBBX26
AT1G68190.1	AtBBX27
AT4G27310.1	AtBBX28
AT5G54470.1	AtBBX29
AT4G15248.1	AtBBX30
AT3G21890.1	AtBBX31
AT3G21150.1	AtBBX32
