# Supplementary material for: Genome-wide identification and expression pattern analysis of quinoa BBX family
Source: PeerJ. 2022 Dec 5;10:e14463. doi: 10.7717/peerj.14463 (PMC9745916; doi:10.7717/peerj.14463)
Supplement: Table S3 [file peerj-10-14463-s003.xlsx]

## Sheet: Sheet1
Table S3 cis-acting elements in the promoter region of CqBBX genes
Gene ID	Gene Name	Element	Sequence	Function	Function category
AUR62023859-RA	CqBBX01	ACE	CTAACGTATT	cis-acting element involved in light responsiveness	Light responsive
AUR62023859-RA	CqBBX01	Box 4	ATTAAT	part of a conserved DNA module involved in light responsiveness	Light responsive
AUR62023859-RA	CqBBX01	Box 4	ATTAAT	part of a conserved DNA module involved in light responsiveness	Light responsive
AUR62023859-RA	CqBBX01	G-Box	CACGTT	cis-acting regulatory element involved in light responsiveness	Light responsive
AUR62023859-RA	CqBBX01	G-Box	TCCACATGGCA	cis-acting regulatory element involved in light responsiveness	Light responsive
AUR62023859-RA	CqBBX01	G-box	CACGAC	cis-acting regulatory element involved in light responsiveness	Light responsive
AUR62023859-RA	CqBBX01	MRE	AACCTAA	MYB binding site involved in light responsiveness	Light responsive
AUR62023859-RA	CqBBX01	MRE	AACCTAA	MYB binding site involved in light responsiveness	Light responsive
AUR62023859-RA	CqBBX01	MRE	AACCTAA	MYB binding site involved in light responsiveness	Light responsive
AUR62035217-RA	CqBBX02	AE-box	AGAAACTT	part of a module for light response	Light responsive
AUR62035217-RA	CqBBX02	AE-box	AGAAACTT	part of a module for light response	Light responsive
AUR62035217-RA	CqBBX02	AT1-motif	AATTATTTTTTATT	part of a light responsive module	Light responsive
AUR62035217-RA	CqBBX02	Box 4	ATTAAT	part of a conserved DNA module involved in light responsiveness	Light responsive
AUR62035217-RA	CqBBX02	Box 4	ATTAAT	part of a conserved DNA module involved in light responsiveness	Light responsive
AUR62035217-RA	CqBBX02	Box 4	ATTAAT	part of a conserved DNA module involved in light responsiveness	Light responsive
AUR62035217-RA	CqBBX02	Box 4	ATTAAT	part of a conserved DNA module involved in light responsiveness	Light responsive
AUR62035217-RA	CqBBX02	Box II	TGGTAATAA	part of a light responsive element	Light responsive
AUR62035217-RA	CqBBX02	G-box	CACGTC	cis-acting regulatory element involved in light responsiveness	Light responsive
AUR62035217-RA	CqBBX02	I-box	atGATAAGGTC	part of a light responsive element	Light responsive
AUR62035217-RA	CqBBX02	I-box	TGATAATGT	part of a light responsive element	Light responsive
AUR62035217-RA	CqBBX02	I-box	AGATAAGG	part of a light responsive element	Light responsive
AUR62035217-RA	CqBBX02	I-box	AAGATAAGGCT	part of a light responsive element	Light responsive
AUR62035217-RA	CqBBX02	I-box	AGATAAGG	part of a light responsive element	Light responsive
AUR62035217-RA	CqBBX02	LAMP-element	CTTTATCA	part of a light responsive element	Light responsive
AUR62035217-RA	CqBBX02	TCT-motif	TCTTAC	part of a light responsive element	Light responsive
AUR62035217-RA	CqBBX02	TCT-motif	TCTTAC	part of a light responsive element	Light responsive
AUR62035217-RA	CqBBX02	TCT-motif	TCTTAC	part of a light responsive element	Light responsive
AUR62035217-RA	CqBBX02	TCT-motif	TCTTAC	part of a light responsive element	Light responsive
AUR62035221-RA	CqBBX03	G-box	TACGTG	cis-acting regulatory element involved in light responsiveness	Light responsive
AUR62035221-RA	CqBBX03	G-box	TACGTG	cis-acting regulatory element involved in light responsiveness	Light responsive
AUR62035221-RA	CqBBX03	G-box	CACGTC	cis-acting regulatory element involved in light responsiveness	Light responsive
AUR62035221-RA	CqBBX03	Sp1	GGGCGG	light responsive element	Light responsive
AUR62035221-RA	CqBBX03	Sp1	GGGCGG	light responsive element	Light responsive
AUR62035221-RA	CqBBX03	Sp1	GGGCGG	light responsive element	Light responsive
AUR62035221-RA	CqBBX03	Sp1	GGGCGG	light responsive element	Light responsive
AUR62035221-RA	CqBBX03	Sp1	GGGCGG	light responsive element	Light responsive
AUR62041089-RA	CqBBX04	AE-box	AGAAACAA	part of a module for light response	Light responsive
AUR62041089-RA	CqBBX04	Box 4	ATTAAT	part of a conserved DNA module involved in light responsiveness	Light responsive
AUR62041089-RA	CqBBX04	Box 4	ATTAAT	part of a conserved DNA module involved in light responsiveness	Light responsive
AUR62041089-RA	CqBBX04	Box 4	ATTAAT	part of a conserved DNA module involved in light responsiveness	Light responsive
AUR62041089-RA	CqBBX04	Box 4	ATTAAT	part of a conserved DNA module involved in light responsiveness	Light responsive
AUR62041089-RA	CqBBX04	Box 4	ATTAAT	part of a conserved DNA module involved in light responsiveness	Light responsive
AUR62041089-RA	CqBBX04	chs-CMA1a	TTACTTAA	part of a light responsive element	Light responsive
AUR62041089-RA	CqBBX04	GA-motif	ATAGATAA	part of a light responsive element	Light responsive
AUR62041089-RA	CqBBX04	GATA-motif	GATAGGG	part of a light responsive element	Light responsive
AUR62041089-RA	CqBBX04	GATA-motif	AAGATAAGATT	part of a light responsive element	Light responsive
AUR62041089-RA	CqBBX04	GATA-motif	AAGGATAAGG	part of a light responsive element	Light responsive
AUR62041089-RA	CqBBX04	GT1-motif	GGTTAA	light responsive element	Light responsive
AUR62041089-RA	CqBBX04	GT1-motif	GGTTAA	light responsive element	Light responsive
AUR62041089-RA	CqBBX04	GT1-motif	GGTTAA	light responsive element	Light responsive
AUR62041089-RA	CqBBX04	GT1-motif	GGTTAA	light responsive element	Light responsive
AUR62041089-RA	CqBBX04	I-box	gGATAAGGTG	part of a light responsive element	Light responsive
AUR62041089-RA	CqBBX04	I-box	AAGATAAGGCT	part of a light responsive element	Light responsive
AUR62041089-RA	CqBBX04	I-box	AGATAAGG	part of a light responsive element	Light responsive
AUR62041089-RA	CqBBX04	MRE	AACCTAA	MYB binding site involved in light responsiveness	Light responsive
AUR62041089-RA	CqBBX04	Sp1	GGGCGG	light responsive element	Light responsive
AUR62002328-RA	CqBBX05	AE-box	AGAAACAA	part of a module for light response	Light responsive
AUR62002328-RA	CqBBX05	Box 4	ATTAAT	part of a conserved DNA module involved in light responsiveness	Light responsive
AUR62002328-RA	CqBBX05	G-box	CACGAC	cis-acting regulatory element involved in light responsiveness	Light responsive
AUR62002328-RA	CqBBX05	G-box	CACGAC	cis-acting regulatory element involved in light responsiveness	Light responsive
AUR62002328-RA	CqBBX05	GT1-motif	GGTTAAT	light responsive element	Light responsive
AUR62002328-RA	CqBBX05	GT1-motif	GGTTAA	light responsive element	Light responsive
AUR62002328-RA	CqBBX05	I-box	gGATAAGGTG	part of a light responsive element	Light responsive
AUR62002328-RA	CqBBX05	MRE	AACCTAA	MYB binding site involved in light responsiveness	Light responsive
AUR62002328-RA	CqBBX05	Sp1	GGGCGG	light responsive element	Light responsive
AUR62002328-RA	CqBBX05	Sp1	GGGCGG	light responsive element	Light responsive
AUR62019649-RA	CqBBX06	ACE	CTAACGTATT	cis-acting element involved in light responsiveness	Light responsive
AUR62019649-RA	CqBBX06	ACE	CTAACGTATT	cis-acting element involved in light responsiveness	Light responsive
AUR62019649-RA	CqBBX06	chs-CMA1a	TTACTTAA	part of a light responsive element	Light responsive
AUR62019649-RA	CqBBX06	G-Box	TCCACATGGCA	cis-acting regulatory element involved in light responsiveness	Light responsive
AUR62019649-RA	CqBBX06	GT1-motif	GGTTAAT	light responsive element	Light responsive
AUR62019649-RA	CqBBX06	GT1-motif	GGTTAA	light responsive element	Light responsive
AUR62019649-RA	CqBBX06	TCCC-motif	TCTCCCT	part of a light responsive element	Light responsive
AUR62019649-RA	CqBBX06	TCT-motif	TCTTAC	part of a light responsive element	Light responsive
AUR62019649-RA	CqBBX06	TCT-motif	TCTTAC	part of a light responsive element	Light responsive
AUR62019649-RA	CqBBX06	TCT-motif	TCTTAC	part of a light responsive element	Light responsive
AUR62030805-RA	CqBBX07	G-Box	CACGTG	cis-acting regulatory element involved in light responsiveness	Light responsive
AUR62030805-RA	CqBBX07	G-Box	CACGTG	cis-acting regulatory element involved in light responsiveness	Light responsive
AUR62030805-RA	CqBBX07	G-Box	CACGTG	cis-acting regulatory element involved in light responsiveness	Light responsive
AUR62030805-RA	CqBBX07	G-Box	CACGTG	cis-acting regulatory element involved in light responsiveness	Light responsive
AUR62030805-RA	CqBBX07	G-box	CACGTC	cis-acting regulatory element involved in light responsiveness	Light responsive
AUR62030805-RA	CqBBX07	G-box	tgACACGTGGCA	cis-acting regulatory element involved in light responsiveness	Light responsive
AUR62030805-RA	CqBBX07	G-box	ACACGTGT	cis-acting regulatory element involved in light responsiveness	Light responsive
AUR62030805-RA	CqBBX07	G-box	CACGTG	cis-acting regulatory element involved in light responsiveness	Light responsive
AUR62040293-RA	CqBBX08	AE-box	AGAAACTT	part of a module for light response	Light responsive
AUR62040293-RA	CqBBX08	AE-box	AGAAACAA	part of a module for light response	Light responsive
AUR62040293-RA	CqBBX08	AE-box	AGAAACTT	part of a module for light response	Light responsive
AUR62040293-RA	CqBBX08	ATCT-motif	AATCTAATCC	part of a conserved DNA module involved in light responsiveness	Light responsive
AUR62040293-RA	CqBBX08	Box 4	ATTAAT	part of a conserved DNA module involved in light responsiveness	Light responsive
AUR62040293-RA	CqBBX08	Box 4	ATTAAT	part of a conserved DNA module involved in light responsiveness	Light responsive
AUR62040293-RA	CqBBX08	Box 4	ATTAAT	part of a conserved DNA module involved in light responsiveness	Light responsive
AUR62040293-RA	CqBBX08	Box 4	ATTAAT	part of a conserved DNA module involved in light responsiveness	Light responsive
AUR62040293-RA	CqBBX08	Box II	TGGTAATAA	part of a light responsive element	Light responsive
AUR62040293-RA	CqBBX08	GATA-motif	AAGGATAAGG	part of a light responsive element	Light responsive
AUR62040293-RA	CqBBX08	G-box	CACGAC	cis-acting regulatory element involved in light responsiveness	Light responsive
AUR62040293-RA	CqBBX08	G-box	CACGTG	cis-acting regulatory element involved in light responsiveness	Light responsive
AUR62040293-RA	CqBBX08	G-box	CACGTG	cis-acting regulatory element involved in light responsiveness	Light responsive
AUR62040293-RA	CqBBX08	G-box	GCCACGTGGA	cis-acting regulatory element involved in light responsiveness	Light responsive
AUR62040293-RA	CqBBX08	G-box	CACGTG	cis-acting regulatory element involved in light responsiveness	Light responsive
AUR62040293-RA	CqBBX08	G-box	CACGAC	cis-acting regulatory element involved in light responsiveness	Light responsive
AUR62040293-RA	CqBBX08	G-box	TACGTG	cis-acting regulatory element involved in light responsiveness	Light responsive
AUR62040293-RA	CqBBX08	G-box	CACGTC	cis-acting regulatory element involved in light responsiveness	Light responsive
AUR62040293-RA	CqBBX08	G-box	CACGTG	cis-acting regulatory element involved in light responsiveness	Light responsive
AUR62040293-RA	CqBBX08	G-box	tgACACGTGGCA	cis-acting regulatory element involved in light responsiveness	Light responsive
AUR62040293-RA	CqBBX08	GT1-motif	GGTTAA	light responsive element	Light responsive
AUR62040293-RA	CqBBX08	GT1-motif	GGTTAA	light responsive element	Light responsive
AUR62040293-RA	CqBBX08	GT1-motif	GGTTAAT	light responsive element	Light responsive
AUR62040293-RA	CqBBX08	GT1-motif	GGTTAA	light responsive element	Light responsive
AUR62040293-RA	CqBBX08	I-box	AGATAAGG	part of a light responsive element	Light responsive
AUR62040293-RA	CqBBX08	MRE	AACCTAA	MYB binding site involved in light responsiveness	Light responsive
AUR62040293-RA	CqBBX08	MRE	AACCTAA	MYB binding site involved in light responsiveness	Light responsive
AUR62040293-RA	CqBBX08	MRE	AACCTAA	MYB binding site involved in light responsiveness	Light responsive
AUR62037849-RA	CqBBX09	G-box	ACACGTGGC	cis-acting regulatory element involved in light responsiveness	Light responsive
AUR62037849-RA	CqBBX09	G-box	CACGTG	cis-acting regulatory element involved in light responsiveness	Light responsive
AUR62037849-RA	CqBBX09	G-Box	CACGTG	cis-acting regulatory element involved in light responsiveness	Light responsive
AUR62037849-RA	CqBBX09	G-Box	TCCACATGGCA	cis-acting regulatory element involved in light responsiveness	Light responsive
AUR62037849-RA	CqBBX09	G-Box	CACGTG	cis-acting regulatory element involved in light responsiveness	Light responsive
AUR62037849-RA	CqBBX09	GT1-motif	GGTTAA	light responsive element	Light responsive
AUR62037849-RA	CqBBX09	GT1-motif	GGTTAA	light responsive element	Light responsive
AUR62009440-RA	CqBBX10	Box 4	ATTAAT	part of a conserved DNA module involved in light responsiveness	Light responsive
AUR62009440-RA	CqBBX10	G-box	CACGAC	cis-acting regulatory element involved in light responsiveness	Light responsive
AUR62009440-RA	CqBBX10	G-box	CACGTC	cis-acting regulatory element involved in light responsiveness	Light responsive
AUR62009440-RA	CqBBX10	G-box	CACGTG	cis-acting regulatory element involved in light responsiveness	Light responsive
AUR62009440-RA	CqBBX10	G-box	ACACGTGGC	cis-acting regulatory element involved in light responsiveness	Light responsive
AUR62009440-RA	CqBBX10	G-box	CACGTG	cis-acting regulatory element involved in light responsiveness	Light responsive
AUR62009440-RA	CqBBX10	G-Box	CACGTG	cis-acting regulatory element involved in light responsiveness	Light responsive
AUR62009440-RA	CqBBX10	G-Box	TCCACATGGCA	cis-acting regulatory element involved in light responsiveness	Light responsive
AUR62009440-RA	CqBBX10	G-Box	CACGTG	cis-acting regulatory element involved in light responsiveness	Light responsive
AUR62009440-RA	CqBBX10	GT1-motif	GGTTAA	light responsive element	Light responsive
AUR62009440-RA	CqBBX10	TCT-motif	TCTTAC	part of a light responsive element	Light responsive
AUR62009440-RA	CqBBX10	TCT-motif	TCTTAC	part of a light responsive element	Light responsive
AUR62009440-RA	CqBBX10	TCT-motif	TCTTAC	part of a light responsive element	Light responsive
AUR62009440-RA	CqBBX10	TCT-motif	TCTTAC	part of a light responsive element	Light responsive
AUR62023118-RA	CqBBX11	Box 4	ATTAAT	part of a conserved DNA module involved in light responsiveness	Light responsive
AUR62023118-RA	CqBBX11	Box 4	ATTAAT	part of a conserved DNA module involved in light responsiveness	Light responsive
AUR62023118-RA	CqBBX11	Box 4	ATTAAT	part of a conserved DNA module involved in light responsiveness	Light responsive
AUR62023118-RA	CqBBX11	Box 4	ATTAAT	part of a conserved DNA module involved in light responsiveness	Light responsive
AUR62023118-RA	CqBBX11	G-Box	CACGTG	cis-acting regulatory element involved in light responsiveness	Light responsive
AUR62023118-RA	CqBBX11	G-box	CACGTG	cis-acting regulatory element involved in light responsiveness	Light responsive
AUR62023118-RA	CqBBX11	G-box	CCACGTAA	cis-acting regulatory element involved in light responsiveness	Light responsive
AUR62023118-RA	CqBBX11	GT1-motif	GGTTAA	light responsive element	Light responsive
AUR62023118-RA	CqBBX11	I-box	TGATAATGT	part of a light responsive element	Light responsive
AUR62023118-RA	CqBBX11	MRE	AACCTAA	MYB binding site involved in light responsiveness	Light responsive
AUR62023118-RA	CqBBX11	TCT-motif	TCTTAC	part of a light responsive element	Light responsive
AUR62023118-RA	CqBBX11	TCT-motif	TCTTAC	part of a light responsive element	Light responsive
AUR62023118-RA	CqBBX11	TCT-motif	TCTTAC	part of a light responsive element	Light responsive
AUR62023118-RA	CqBBX11	TCT-motif	TCTTAC	part of a light responsive element	Light responsive
AUR62037140-RA	CqBBX12	Box 4	ATTAAT	part of a conserved DNA module involved in light responsiveness	Light responsive
AUR62037140-RA	CqBBX12	Box 4	ATTAAT	part of a conserved DNA module involved in light responsiveness	Light responsive
AUR62037140-RA	CqBBX12	GA-motif	ATAGATAA	part of a light responsive element	Light responsive
AUR62037140-RA	CqBBX12	GATA-motif	GATAGGA	part of a light responsive element	Light responsive
AUR62037140-RA	CqBBX12	G-box	TACGTG	cis-acting regulatory element involved in light responsiveness	Light responsive
AUR62037140-RA	CqBBX12	G-Box	CACGTT	cis-acting regulatory element involved in light responsiveness	Light responsive
AUR62037140-RA	CqBBX12	GT1-motif	GGTTAAT	light responsive element	Light responsive
AUR62037140-RA	CqBBX12	GT1-motif	GGTTAA	light responsive element	Light responsive
AUR62034563-RA	CqBBX13	ACE	GACACGTATG	cis-acting element involved in light responsiveness	Light responsive
AUR62034563-RA	CqBBX13	ATCT-motif	AATCTAATCC	part of a conserved DNA module involved in light responsiveness	Light responsive
AUR62034563-RA	CqBBX13	Box 4	ATTAAT	part of a conserved DNA module involved in light responsiveness	Light responsive
AUR62034563-RA	CqBBX13	Box 4	ATTAAT	part of a conserved DNA module involved in light responsiveness	Light responsive
AUR62034563-RA	CqBBX13	Box 4	ATTAAT	part of a conserved DNA module involved in light responsiveness	Light responsive
AUR62034563-RA	CqBBX13	Box 4	ATTAAT	part of a conserved DNA module involved in light responsiveness	Light responsive
AUR62034563-RA	CqBBX13	G-box	CACGAC	cis-acting regulatory element involved in light responsiveness	Light responsive
AUR62034563-RA	CqBBX13	GT1-motif	GGTTAA	light responsive element	Light responsive
AUR62034563-RA	CqBBX13	GT1-motif	GGTTAAT	light responsive element	Light responsive
AUR62034638-RA	CqBBX14	Box 4	ATTAAT	part of a conserved DNA module involved in light responsiveness	Light responsive
AUR62034638-RA	CqBBX14	chs-CMA1a	TTACTTAA	part of a light responsive element	Light responsive
AUR62034638-RA	CqBBX14	G-Box	TCCACATGGCA	cis-acting regulatory element involved in light responsiveness	Light responsive
AUR62034638-RA	CqBBX14	GT1-motif	GGTTAA	light responsive element	Light responsive
AUR62034638-RA	CqBBX14	GT1-motif	GGTTAAT	light responsive element	Light responsive
AUR62034638-RA	CqBBX14	I-box	GTATAAGGCC	part of a light responsive element	Light responsive
AUR62034638-RA	CqBBX14	Sp1	GGGCGG	light responsive element	Light responsive
AUR62034638-RA	CqBBX14	Sp1	GGGCGG	light responsive element	Light responsive
AUR62034638-RA	CqBBX14	Sp1	GGGCGG	light responsive element	Light responsive
AUR62034638-RA	CqBBX14	Sp1	GGGCGG	light responsive element	Light responsive
AUR62034638-RA	CqBBX14	Sp1	GGGCGG	light responsive element	Light responsive
AUR62034638-RA	CqBBX14	Sp1	GGGCGG	light responsive element	Light responsive
AUR62020307-RA	CqBBX15	3-AF1 binding site	TAAGAGAGGAA	light responsive element	Light responsive
AUR62020307-RA	CqBBX15	ACE	GACACGTATG	cis-acting element involved in light responsiveness	Light responsive
AUR62020307-RA	CqBBX15	AE-box	AGAAACTT	part of a module for light response	Light responsive
AUR62020307-RA	CqBBX15	ATCT-motif	AATCTAATCC	part of a conserved DNA module involved in light responsiveness	Light responsive
AUR62020307-RA	CqBBX15	Box 4	ATTAAT	part of a conserved DNA module involved in light responsiveness	Light responsive
AUR62020307-RA	CqBBX15	Box 4	ATTAAT	part of a conserved DNA module involved in light responsiveness	Light responsive
AUR62020307-RA	CqBBX15	Box 4	ATTAAT	part of a conserved DNA module involved in light responsiveness	Light responsive
AUR62020307-RA	CqBBX15	Box II	TGGTAATAA	part of a light responsive element	Light responsive
AUR62020307-RA	CqBBX15	chs-CMA1a	TTACTTAA	part of a light responsive element	Light responsive
AUR62020307-RA	CqBBX15	chs-CMA1a	TTACTTAA	part of a light responsive element	Light responsive
AUR62020307-RA	CqBBX15	chs-CMA1a	TTACTTAA	part of a light responsive element	Light responsive
AUR62020307-RA	CqBBX15	GATA-motif	GATAGGG	part of a light responsive element	Light responsive
AUR62020307-RA	CqBBX15	G-box	TACGTG	cis-acting regulatory element involved in light responsiveness	Light responsive
AUR62020307-RA	CqBBX15	I-box	cGATAAGGCG	part of a light responsive element	Light responsive
AUR62020307-RA	CqBBX15	I-box	AAGATAAGGCT	part of a light responsive element	Light responsive
AUR62020307-RA	CqBBX15	MRE	AACCTAA	MYB binding site involved in light responsiveness	Light responsive
AUR62020307-RA	CqBBX15	MRE	AACCTAA	MYB binding site involved in light responsiveness	Light responsive
AUR62020307-RA	CqBBX15	Sp1	GGGCGG	light responsive element	Light responsive
AUR62020307-RA	CqBBX15	TCT-motif	TCTTAC	part of a light responsive element	Light responsive
AUR62020307-RA	CqBBX15	TCT-motif	TCTTAC	part of a light responsive element	Light responsive
AUR62020307-RA	CqBBX15	TCT-motif	TCTTAC	part of a light responsive element	Light responsive
AUR62002867-RA	CqBBX16	AE-box	AGAAACAA	part of a module for light response	Light responsive
AUR62002867-RA	CqBBX16	ATCT-motif	AATCTAATCC	part of a conserved DNA module involved in light responsiveness	Light responsive
AUR62002867-RA	CqBBX16	ATCT-motif	AATCTAATCC	part of a conserved DNA module involved in light responsiveness	Light responsive
AUR62002867-RA	CqBBX16	G-Box	CACGTT	cis-acting regulatory element involved in light responsiveness	Light responsive
AUR62002867-RA	CqBBX16	G-box	CACGTC	cis-acting regulatory element involved in light responsiveness	Light responsive
AUR62002867-RA	CqBBX16	GT1-motif	GGTTAA	light responsive element	Light responsive
AUR62002867-RA	CqBBX16	GT1-motif	GGTTAAT	light responsive element	Light responsive
AUR62002867-RA	CqBBX16	GT1-motif	GGTTAA	light responsive element	Light responsive
AUR62002867-RA	CqBBX16	I-box	AGATAAGG	part of a light responsive element	Light responsive
AUR62002867-RA	CqBBX16	MRE	AACCTAA	MYB binding site involved in light responsiveness	Light responsive
AUR62002867-RA	CqBBX16	MRE	AACCTAA	MYB binding site involved in light responsiveness	Light responsive
AUR62002867-RA	CqBBX16	TCT-motif	TCTTAC	part of a light responsive element	Light responsive
AUR62002793-RA	CqBBX17	Box 4	ATTAAT	part of a conserved DNA module involved in light responsiveness	Light responsive
AUR62002793-RA	CqBBX17	Box 4	ATTAAT	part of a conserved DNA module involved in light responsiveness	Light responsive
AUR62002793-RA	CqBBX17	Box 4	ATTAAT	part of a conserved DNA module involved in light responsiveness	Light responsive
AUR62002793-RA	CqBBX17	Box 4	ATTAAT	part of a conserved DNA module involved in light responsiveness	Light responsive
AUR62002793-RA	CqBBX17	chs-CMA1a	TTACTTAA	part of a light responsive element	Light responsive
AUR62002793-RA	CqBBX17	GATA-motif	AAGGATAAGG	part of a light responsive element	Light responsive
AUR62002793-RA	CqBBX17	G-box	CACGTC	cis-acting regulatory element involved in light responsiveness	Light responsive
AUR62002793-RA	CqBBX17	G-box	TAACACGTAG	cis-acting regulatory element involved in light responsiveness	Light responsive
AUR62002793-RA	CqBBX17	G-box	CCACGTAA	cis-acting regulatory element involved in light responsiveness	Light responsive
AUR62002793-RA	CqBBX17	G-box	TACGTG	cis-acting regulatory element involved in light responsiveness	Light responsive
AUR62002793-RA	CqBBX17	G-Box	TCCACATGGCA	cis-acting regulatory element involved in light responsiveness	Light responsive
AUR62002793-RA	CqBBX17	GT1-motif	GGTTAAT	light responsive element	Light responsive
AUR62002793-RA	CqBBX17	GT1-motif	GGTTAA	light responsive element	Light responsive
AUR62002793-RA	CqBBX17	GT1-motif	GGTTAA	light responsive element	Light responsive
AUR62002793-RA	CqBBX17	TCT-motif	TCTTAC	part of a light responsive element	Light responsive
AUR62014436-RA	CqBBX18	Box 4	ATTAAT	part of a conserved DNA module involved in light responsiveness	Light responsive
AUR62014436-RA	CqBBX18	Box 4	ATTAAT	part of a conserved DNA module involved in light responsiveness	Light responsive
AUR62014436-RA	CqBBX18	Box 4	ATTAAT	part of a conserved DNA module involved in light responsiveness	Light responsive
AUR62014436-RA	CqBBX18	Box 4	ATTAAT	part of a conserved DNA module involved in light responsiveness	Light responsive
AUR62014436-RA	CqBBX18	Box 4	ATTAAT	part of a conserved DNA module involved in light responsiveness	Light responsive
AUR62014436-RA	CqBBX18	Box 4	ATTAAT	part of a conserved DNA module involved in light responsiveness	Light responsive
AUR62014436-RA	CqBBX18	Box 4	ATTAAT	part of a conserved DNA module involved in light responsiveness	Light responsive
AUR62014436-RA	CqBBX18	Box 4	ATTAAT	part of a conserved DNA module involved in light responsiveness	Light responsive
AUR62014436-RA	CqBBX18	Box 4	ATTAAT	part of a conserved DNA module involved in light responsiveness	Light responsive
AUR62014436-RA	CqBBX18	GT1-motif	GGTTAA	light responsive element	Light responsive
AUR62014436-RA	CqBBX18	MRE	AACCTAA	MYB binding site involved in light responsiveness	Light responsive
AUR62014436-RA	CqBBX18	TCCC-motif	TCTCCCT	part of a light responsive element	Light responsive
AUR62039579-RA	CqBBX19	Box 4	ATTAAT	part of a conserved DNA module involved in light responsiveness	Light responsive
AUR62039579-RA	CqBBX19	Box 4	ATTAAT	part of a conserved DNA module involved in light responsiveness	Light responsive
AUR62039579-RA	CqBBX19	Box 4	ATTAAT	part of a conserved DNA module involved in light responsiveness	Light responsive
AUR62039579-RA	CqBBX19	Box 4	ATTAAT	part of a conserved DNA module involved in light responsiveness	Light responsive
AUR62039579-RA	CqBBX19	Box 4	ATTAAT	part of a conserved DNA module involved in light responsiveness	Light responsive
AUR62039579-RA	CqBBX19	GATA-motif	GATAGGA	part of a light responsive element	Light responsive
AUR62039579-RA	CqBBX19	G-box	GCCACGTGGA	cis-acting regulatory element involved in light responsiveness	Light responsive
AUR62039579-RA	CqBBX19	G-box	CACGTG	cis-acting regulatory element involved in light responsiveness	Light responsive
AUR62039579-RA	CqBBX19	G-box	TACGTG	cis-acting regulatory element involved in light responsiveness	Light responsive
AUR62039579-RA	CqBBX19	G-Box	CACGTG	cis-acting regulatory element involved in light responsiveness	Light responsive
AUR62039579-RA	CqBBX19	TCCC-motif	TCTCCCT	part of a light responsive element	Light responsive
AUR62039579-RA	CqBBX19	TCT-motif	TCTTAC	part of a light responsive element	Light responsive
AUR62039579-RA	CqBBX19	TCT-motif	TCTTAC	part of a light responsive element	Light responsive
AUR62016801-RA	CqBBX20	Box II	CCACGTGGC	part of a light responsive element	Light responsive
AUR62016801-RA	CqBBX20	GATA-motif	GATAGGG	part of a light responsive element	Light responsive
AUR62016801-RA	CqBBX20	G-Box	CACGTT	cis-acting regulatory element involved in light responsiveness	Light responsive
AUR62016801-RA	CqBBX20	GT1-motif	GGTTAA	light responsive element	Light responsive
AUR62016801-RA	CqBBX20	Sp1	GGGCGG	light responsive element	Light responsive
AUR62016828-RA	CqBBX21	ATCT-motif	AATCTAATCC	part of a conserved DNA module involved in light responsiveness	Light responsive
AUR62016828-RA	CqBBX21	Box 4	ATTAAT	part of a conserved DNA module involved in light responsiveness	Light responsive
AUR62016828-RA	CqBBX21	G-Box	CACGTT	cis-acting regulatory element involved in light responsiveness	Light responsive
AUR62016828-RA	CqBBX21	G-box	CACGTC	cis-acting regulatory element involved in light responsiveness	Light responsive
AUR62016828-RA	CqBBX21	GT1-motif	GGTTAA	light responsive element	Light responsive
AUR62016828-RA	CqBBX21	GT1-motif	GGTTAAT	light responsive element	Light responsive
AUR62016828-RA	CqBBX21	GT1-motif	GGTTAA	light responsive element	Light responsive
AUR62016828-RA	CqBBX21	MRE	AACCTAA	MYB binding site involved in light responsiveness	Light responsive
AUR62016828-RA	CqBBX21	MRE	AACCTAA	MYB binding site involved in light responsiveness	Light responsive
AUR62014102-RA	CqBBX22	AE-box	AGAAACTT	part of a module for light response	Light responsive
AUR62014102-RA	CqBBX22	Box 4	ATTAAT	part of a conserved DNA module involved in light responsiveness	Light responsive
AUR62014102-RA	CqBBX22	Box 4	ATTAAT	part of a conserved DNA module involved in light responsiveness	Light responsive
AUR62014102-RA	CqBBX22	Box 4	ATTAAT	part of a conserved DNA module involved in light responsiveness	Light responsive
AUR62014102-RA	CqBBX22	GATA-motif	GATAGGG	part of a light responsive element	Light responsive
AUR62014102-RA	CqBBX22	GATA-motif	GATAGGA	part of a light responsive element	Light responsive
AUR62014102-RA	CqBBX22	GATA-motif	GATAGGA	part of a light responsive element	Light responsive
AUR62014102-RA	CqBBX22	GATA-motif	GATAGGA	part of a light responsive element	Light responsive
AUR62014102-RA	CqBBX22	G-box	TAAACGTG	cis-acting regulatory element involved in light responsiveness	Light responsive
AUR62014102-RA	CqBBX22	G-box	ACACGTG(G/t)CACC	cis-acting regulatory element involved in light responsiveness	Light responsive
AUR62014102-RA	CqBBX22	G-box	tgACACGTGGCA	cis-acting regulatory element involved in light responsiveness	Light responsive
AUR62014102-RA	CqBBX22	G-box	ACACGTGT	cis-acting regulatory element involved in light responsiveness	Light responsive
AUR62014102-RA	CqBBX22	G-box	CACGTG	cis-acting regulatory element involved in light responsiveness	Light responsive
AUR62014102-RA	CqBBX22	G-box	tgACACGTGGCA	cis-acting regulatory element involved in light responsiveness	Light responsive
AUR62014102-RA	CqBBX22	G-box	ACACGTGGC	cis-acting regulatory element involved in light responsiveness	Light responsive
AUR62014102-RA	CqBBX22	G-box	CACGTG	cis-acting regulatory element involved in light responsiveness	Light responsive
AUR62014102-RA	CqBBX22	G-Box	CACGTT	cis-acting regulatory element involved in light responsiveness	Light responsive
AUR62014102-RA	CqBBX22	TCT-motif	TCTTAC	part of a light responsive element	Light responsive
AUR62041163-RA	CqBBX23	3-AF1 binding site	TAAGAGAGGAA	light responsive element	Light responsive
AUR62041163-RA	CqBBX23	AE-box	AGAAACAA	part of a module for light response	Light responsive
AUR62041163-RA	CqBBX23	Box 4	ATTAAT	part of a conserved DNA module involved in light responsiveness	Light responsive
AUR62041163-RA	CqBBX23	Box 4	ATTAAT	part of a conserved DNA module involved in light responsiveness	Light responsive
AUR62041163-RA	CqBBX23	Box 4	ATTAAT	part of a conserved DNA module involved in light responsiveness	Light responsive
AUR62041163-RA	CqBBX23	Box 4	ATTAAT	part of a conserved DNA module involved in light responsiveness	Light responsive
AUR62041163-RA	CqBBX23	Box 4	ATTAAT	part of a conserved DNA module involved in light responsiveness	Light responsive
AUR62041163-RA	CqBBX23	chs-CMA2b	GAACCTACACAC	part of a light responsive element	Light responsive
AUR62041163-RA	CqBBX23	GA-motif	ATAGATAA	part of a light responsive element	Light responsive
AUR62041163-RA	CqBBX23	GATA-motif	GATAGGA	part of a light responsive element	Light responsive
AUR62041163-RA	CqBBX23	GATA-motif	AAGATAAGATT	part of a light responsive element	Light responsive
AUR62041163-RA	CqBBX23	G-Box	CACGTT	cis-acting regulatory element involved in light responsiveness	Light responsive
AUR62041163-RA	CqBBX23	G-Box	CACGTG	cis-acting regulatory element involved in light responsiveness	Light responsive
AUR62041163-RA	CqBBX23	G-Box	CACGTT	cis-acting regulatory element involved in light responsiveness	Light responsive
AUR62041163-RA	CqBBX23	G-Box	CACGTG	cis-acting regulatory element involved in light responsiveness	Light responsive
AUR62041163-RA	CqBBX23	G-Box	CACGTT	cis-acting regulatory element involved in light responsiveness	Light responsive
AUR62041163-RA	CqBBX23	G-Box	CACGTG	cis-acting regulatory element involved in light responsiveness	Light responsive
AUR62041163-RA	CqBBX23	G-Box	CACGTT	cis-acting regulatory element involved in light responsiveness	Light responsive
AUR62041163-RA	CqBBX23	GT1-motif	GGTTAA	light responsive element	Light responsive
AUR62041163-RA	CqBBX23	GT1-motif	GGTTAAT	light responsive element	Light responsive
AUR62041163-RA	CqBBX23	GT1-motif	GGTTAA	light responsive element	Light responsive
AUR62041163-RA	CqBBX23	I-box	TGATAATGT	part of a light responsive element	Light responsive
AUR62041163-RA	CqBBX23	MRE	AACCTAA	MYB binding site involved in light responsiveness	Light responsive
AUR62041163-RA	CqBBX23	MRE	AACCTAA	MYB binding site involved in light responsiveness	Light responsive
AUR62041163-RA	CqBBX23	MRE	AACCTAA	MYB binding site involved in light responsiveness	Light responsive
AUR62041163-RA	CqBBX23	TCT-motif	TCTTAC	part of a light responsive element	Light responsive
AUR62025058-RA	CqBBX24	G-Box	CACGTG	cis-acting regulatory element involved in light responsiveness	Light responsive
AUR62025058-RA	CqBBX24	G-box	CACGAC	cis-acting regulatory element involved in light responsiveness	Light responsive
AUR62025058-RA	CqBBX24	G-box	CACGTG	cis-acting regulatory element involved in light responsiveness	Light responsive
AUR62025058-RA	CqBBX24	G-box	GCCACGTGGA	cis-acting regulatory element involved in light responsiveness	Light responsive
AUR62025058-RA	CqBBX24	G-box	CACGTG	cis-acting regulatory element involved in light responsiveness	Light responsive
AUR62025058-RA	CqBBX24	GT1-motif	GGTTAAT	light responsive element	Light responsive
AUR62025058-RA	CqBBX24	GT1-motif	GGTTAA	light responsive element	Light responsive
AUR62039984-RA	CqBBX25	Box 4	ATTAAT	part of a conserved DNA module involved in light responsiveness	Light responsive
AUR62039984-RA	CqBBX25	Box 4	ATTAAT	part of a conserved DNA module involved in light responsiveness	Light responsive
AUR62039984-RA	CqBBX25	Box 4	ATTAAT	part of a conserved DNA module involved in light responsiveness	Light responsive
AUR62039984-RA	CqBBX25	Box 4	ATTAAT	part of a conserved DNA module involved in light responsiveness	Light responsive
AUR62039984-RA	CqBBX25	Box 4	ATTAAT	part of a conserved DNA module involved in light responsiveness	Light responsive
AUR62039984-RA	CqBBX25	Box 4	ATTAAT	part of a conserved DNA module involved in light responsiveness	Light responsive
AUR62039984-RA	CqBBX25	Box II	TGGTAATAA	part of a light responsive element	Light responsive
AUR62039984-RA	CqBBX25	GATA-motif	GATAGGA	part of a light responsive element	Light responsive
AUR62039984-RA	CqBBX25	G-box	TACGTG	cis-acting regulatory element involved in light responsiveness	Light responsive
AUR62039984-RA	CqBBX25	G-box	ACACGTGT	cis-acting regulatory element involved in light responsiveness	Light responsive
AUR62039984-RA	CqBBX25	G-box	CACGTG	cis-acting regulatory element involved in light responsiveness	Light responsive
AUR62039984-RA	CqBBX25	G-Box	CACGTT	cis-acting regulatory element involved in light responsiveness	Light responsive
AUR62039984-RA	CqBBX25	G-Box	CACGTG	cis-acting regulatory element involved in light responsiveness	Light responsive
AUR62039984-RA	CqBBX25	GT1-motif	GGTTAA	light responsive element	Light responsive
AUR62039984-RA	CqBBX25	GT1-motif	GGTTAAT	light responsive element	Light responsive
AUR62039984-RA	CqBBX25	GT1-motif	GGTTAA	light responsive element	Light responsive
AUR62039984-RA	CqBBX25	GT1-motif	GGTTAA	light responsive element	Light responsive
AUR62039984-RA	CqBBX25	GT1-motif	GGTTAA	light responsive element	Light responsive
AUR62039984-RA	CqBBX25	GT1-motif	GGTTAAT	light responsive element	Light responsive
AUR62039984-RA	CqBBX25	GT1-motif	GGTTAA	light responsive element	Light responsive
AUR62039984-RA	CqBBX25	MRE	AACCTAA	MYB binding site involved in light responsiveness	Light responsive
AUR62039984-RA	CqBBX25	TCT-motif	TCTTAC	part of a light responsive element	Light responsive
AUR62039984-RA	CqBBX25	TCT-motif	TCTTAC	part of a light responsive element	Light responsive
AUR62039984-RA	CqBBX25	TCT-motif	TCTTAC	part of a light responsive element	Light responsive
AUR62001354-RA	CqBBX26	AE-box	AGAAACAA	part of a module for light response	Light responsive
AUR62001354-RA	CqBBX26	ATCT-motif	AATCTAATCC	part of a conserved DNA module involved in light responsiveness	Light responsive
AUR62001354-RA	CqBBX26	Box 4	ATTAAT	part of a conserved DNA module involved in light responsiveness	Light responsive
AUR62001354-RA	CqBBX26	Box 4	ATTAAT	part of a conserved DNA module involved in light responsiveness	Light responsive
AUR62001354-RA	CqBBX26	GATA-motif	GATAGGA	part of a light responsive element	Light responsive
AUR62001354-RA	CqBBX26	G-box	CACGAC	cis-acting regulatory element involved in light responsiveness	Light responsive
AUR62001354-RA	CqBBX26	G-box	TACGTG	cis-acting regulatory element involved in light responsiveness	Light responsive
AUR62001354-RA	CqBBX26	GT1-motif	GGTTAA	light responsive element	Light responsive
AUR62001354-RA	CqBBX26	GT1-motif	GGTTAAT	light responsive element	Light responsive
AUR62001354-RA	CqBBX26	GT1-motif	GGTTAA	light responsive element	Light responsive
AUR62001354-RA	CqBBX26	GT1-motif	GGTTAA	light responsive element	Light responsive
AUR62001354-RA	CqBBX26	GT1-motif	GGTTAAT	light responsive element	Light responsive
AUR62001354-RA	CqBBX26	MRE	AACCTAA	MYB binding site involved in light responsiveness	Light responsive
AUR62001354-RA	CqBBX26	MRE	AACCTAA	MYB binding site involved in light responsiveness	Light responsive
AUR62001354-RA	CqBBX26	TCCC-motif	TCTCCCT	part of a light responsive element	Light responsive
AUR62001354-RA	CqBBX26	TCT-motif	TCTTAC	part of a light responsive element	Light responsive
AUR62001354-RA	CqBBX26	TCT-motif	TCTTAC	part of a light responsive element	Light responsive
AUR62008578-RA	CqBBX27	Box 4	ATTAAT	part of a conserved DNA module involved in light responsiveness	Light responsive
AUR62008578-RA	CqBBX27	Box 4	ATTAAT	part of a conserved DNA module involved in light responsiveness	Light responsive
AUR62008578-RA	CqBBX27	Box 4	ATTAAT	part of a conserved DNA module involved in light responsiveness	Light responsive
AUR62008578-RA	CqBBX27	Box 4	ATTAAT	part of a conserved DNA module involved in light responsiveness	Light responsive
AUR62008578-RA	CqBBX27	Box 4	ATTAAT	part of a conserved DNA module involved in light responsiveness	Light responsive
AUR62008578-RA	CqBBX27	Box 4	ATTAAT	part of a conserved DNA module involved in light responsiveness	Light responsive
AUR62008578-RA	CqBBX27	Box 4	ATTAAT	part of a conserved DNA module involved in light responsiveness	Light responsive
AUR62008578-RA	CqBBX27	Box 4	ATTAAT	part of a conserved DNA module involved in light responsiveness	Light responsive
AUR62008578-RA	CqBBX27	Box 4	ATTAAT	part of a conserved DNA module involved in light responsiveness	Light responsive
AUR62008578-RA	CqBBX27	Box 4	ATTAAT	part of a conserved DNA module involved in light responsiveness	Light responsive
AUR62008578-RA	CqBBX27	Box 4	ATTAAT	part of a conserved DNA module involved in light responsiveness	Light responsive
AUR62008578-RA	CqBBX27	Box 4	ATTAAT	part of a conserved DNA module involved in light responsiveness	Light responsive
AUR62008578-RA	CqBBX27	Box 4	ATTAAT	part of a conserved DNA module involved in light responsiveness	Light responsive
AUR62008578-RA	CqBBX27	Box 4	ATTAAT	part of a conserved DNA module involved in light responsiveness	Light responsive
AUR62008578-RA	CqBBX27	Box 4	ATTAAT	part of a conserved DNA module involved in light responsiveness	Light responsive
AUR62008578-RA	CqBBX27	Box 4	ATTAAT	part of a conserved DNA module involved in light responsiveness	Light responsive
AUR62008578-RA	CqBBX27	Box 4	ATTAAT	part of a conserved DNA module involved in light responsiveness	Light responsive
AUR62008578-RA	CqBBX27	chs-CMA1a	TTACTTAA	part of a light responsive element	Light responsive
AUR62008578-RA	CqBBX27	Gap-box	CAAATGAA(A/G)A	part of a light responsive element	Light responsive
AUR62008578-RA	CqBBX27	GATA-motif	AAGGATAAGG	part of a light responsive element	Light responsive
AUR62008578-RA	CqBBX27	G-box	TACGTG	cis-acting regulatory element involved in light responsiveness	Light responsive
AUR62008578-RA	CqBBX27	G-box	ACACGTGT	cis-acting regulatory element involved in light responsiveness	Light responsive
AUR62008578-RA	CqBBX27	G-box	CACGTG	cis-acting regulatory element involved in light responsiveness	Light responsive
AUR62008578-RA	CqBBX27	G-box	TAAACGTG	cis-acting regulatory element involved in light responsiveness	Light responsive
AUR62008578-RA	CqBBX27	G-box	TACGTG	cis-acting regulatory element involved in light responsiveness	Light responsive
AUR62008578-RA	CqBBX27	G-Box	CACGTG	cis-acting regulatory element involved in light responsiveness	Light responsive
AUR62008578-RA	CqBBX27	G-Box	CACGTT	cis-acting regulatory element involved in light responsiveness	Light responsive
AUR62008578-RA	CqBBX27	G-Box	CACGTT	cis-acting regulatory element involved in light responsiveness	Light responsive
AUR62008578-RA	CqBBX27	G-Box	CACGTT	cis-acting regulatory element involved in light responsiveness	Light responsive
AUR62008578-RA	CqBBX27	L-box	ATCCCACCTAC	part of a light responsive element	Light responsive
AUR62025650-RA	CqBBX28	AAAC-motif	CAATCAAAACCT	light responsive element	Light responsive
AUR62025650-RA	CqBBX28	ATCT-motif	AATCTAATCC	part of a conserved DNA module involved in light responsiveness	Light responsive
AUR62025650-RA	CqBBX28	ATCT-motif	AATCTAATCC	part of a conserved DNA module involved in light responsiveness	Light responsive
AUR62025650-RA	CqBBX28	Box 4	ATTAAT	part of a conserved DNA module involved in light responsiveness	Light responsive
AUR62025650-RA	CqBBX28	Box 4	ATTAAT	part of a conserved DNA module involved in light responsiveness	Light responsive
AUR62025650-RA	CqBBX28	Box 4	ATTAAT	part of a conserved DNA module involved in light responsiveness	Light responsive
AUR62025650-RA	CqBBX28	Box 4	ATTAAT	part of a conserved DNA module involved in light responsiveness	Light responsive
AUR62025650-RA	CqBBX28	GT1-motif	GGTTAAT	light responsive element	Light responsive
AUR62025650-RA	CqBBX28	GT1-motif	GGTTAA	light responsive element	Light responsive
AUR62025650-RA	CqBBX28	GT1-motif	GGTTAA	light responsive element	Light responsive
AUR62025650-RA	CqBBX28	GT1-motif	GGTTAA	light responsive element	Light responsive
AUR62025650-RA	CqBBX28	GT1-motif	GGTTAA	light responsive element	Light responsive
AUR62025650-RA	CqBBX28	GT1-motif	GGTTAAT	light responsive element	Light responsive
AUR62025650-RA	CqBBX28	GT1-motif	GGTTAA	light responsive element	Light responsive
AUR62025650-RA	CqBBX28	MRE	AACCTAA	MYB binding site involved in light responsiveness	Light responsive
AUR62025650-RA	CqBBX28	MRE	AACCTAA	MYB binding site involved in light responsiveness	Light responsive
AUR62025650-RA	CqBBX28	MRE	AACCTAA	MYB binding site involved in light responsiveness	Light responsive
AUR62025650-RA	CqBBX28	MRE	AACCTAA	MYB binding site involved in light responsiveness	Light responsive
AUR62025650-RA	CqBBX28	TCCC-motif	TCTCCCT	part of a light responsive element	Light responsive
AUR62025650-RA	CqBBX28	TCCC-motif	TCTCCCT	part of a light responsive element	Light responsive
AUR62025650-RA	CqBBX28	TCCC-motif	TCTCCCT	part of a light responsive element	Light responsive
AUR62025650-RA	CqBBX28	TCT-motif	TCTTAC	part of a light responsive element	Light responsive
AUR62030486-RA	CqBBX29	ATCT-motif	AATCTAATCC	part of a conserved DNA module involved in light responsiveness	Light responsive
AUR62030486-RA	CqBBX29	Box 4	ATTAAT	part of a conserved DNA module involved in light responsiveness	Light responsive
AUR62030486-RA	CqBBX29	Box 4	ATTAAT	part of a conserved DNA module involved in light responsiveness	Light responsive
AUR62030486-RA	CqBBX29	Box 4	ATTAAT	part of a conserved DNA module involved in light responsiveness	Light responsive
AUR62030486-RA	CqBBX29	Box 4	ATTAAT	part of a conserved DNA module involved in light responsiveness	Light responsive
AUR62030486-RA	CqBBX29	Box 4	ATTAAT	part of a conserved DNA module involved in light responsiveness	Light responsive
AUR62030486-RA	CqBBX29	Box 4	ATTAAT	part of a conserved DNA module involved in light responsiveness	Light responsive
AUR62030486-RA	CqBBX29	Box 4	ATTAAT	part of a conserved DNA module involved in light responsiveness	Light responsive
AUR62030486-RA	CqBBX29	Box 4	ATTAAT	part of a conserved DNA module involved in light responsiveness	Light responsive
AUR62030486-RA	CqBBX29	GA-motif	ATAGATAA	part of a light responsive element	Light responsive
AUR62030486-RA	CqBBX29	GATA-motif	AAGATAAGATT	part of a light responsive element	Light responsive
AUR62030486-RA	CqBBX29	GATA-motif	AAGATAAGATT	part of a light responsive element	Light responsive
AUR62030486-RA	CqBBX29	GT1-motif	GGTTAA	light responsive element	Light responsive
AUR62030486-RA	CqBBX29	LAMP-element	CTTTATCA	part of a light responsive element	Light responsive
AUR62030486-RA	CqBBX29	TCT-motif	TCTTAC	part of a light responsive element	Light responsive
AUR62030486-RA	CqBBX29	TCT-motif	TCTTAC	part of a light responsive element	Light responsive
AUR62010415-RA	CqBBX30	AE-box	AGAAACAA	part of a module for light response	Light responsive
AUR62010415-RA	CqBBX30	AE-box	AGAAACAA	part of a module for light response	Light responsive
AUR62010415-RA	CqBBX30	Box 4	ATTAAT	part of a conserved DNA module involved in light responsiveness	Light responsive
AUR62010415-RA	CqBBX30	chs-CMA1a	TTACTTAA	part of a light responsive element	Light responsive
AUR62010415-RA	CqBBX30	GATA-motif	AAGGATAAGG	part of a light responsive element	Light responsive
AUR62010415-RA	CqBBX30	I-box	AAGATAAGGCT	part of a light responsive element	Light responsive
AUR62010415-RA	CqBBX30	I-box	AGATAAGG	part of a light responsive element	Light responsive
AUR62010415-RA	CqBBX30	LAMP-element	CTTTATCA	part of a light responsive element	Light responsive
AUR62010415-RA	CqBBX30	MRE	AACCTAA	MYB binding site involved in light responsiveness	Light responsive
AUR62010415-RA	CqBBX30	TCCC-motif	TCTCCCT	part of a light responsive element	Light responsive
AUR62010415-RA	CqBBX30	TCT-motif	TCTTAC	part of a light responsive element	Light responsive
AUR62010415-RA	CqBBX30	TCT-motif	TCTTAC	part of a light responsive element	Light responsive
AUR62010390-RA	CqBBX31	AE-box	AGAAACAA	part of a module for light response	Light responsive
AUR62010390-RA	CqBBX31	AE-box	AGAAACAA	part of a module for light response	Light responsive
AUR62010390-RA	CqBBX31	Box 4	ATTAAT	part of a conserved DNA module involved in light responsiveness	Light responsive
AUR62010390-RA	CqBBX31	GATA-motif	AAGGATAAGG	part of a light responsive element	Light responsive
AUR62010390-RA	CqBBX31	I-box	AAGATAAGGCT	part of a light responsive element	Light responsive
AUR62010390-RA	CqBBX31	I-box	AGATAAGG	part of a light responsive element	Light responsive
AUR62010390-RA	CqBBX31	Sp1	GGGCGG	light responsive element	Light responsive
AUR62010390-RA	CqBBX31	Sp1	GGGCGG	light responsive element	Light responsive
AUR62010390-RA	CqBBX31	Sp1	GGGCGG	light responsive element	Light responsive
AUR62023859-RA	CqBBX01	TCA-element	CCATCTTTTT	cis-acting element involved in salicylic acid responsiveness	Phytohormone responsiveness
AUR62035217-RA	CqBBX02	ABRE	ACGTG	cis-acting element involved in the abscisic acid responsiveness	Phytohormone responsiveness
AUR62035217-RA	CqBBX02	TGA-element	AACGAC	auxin-responsive element	Phytohormone responsiveness
AUR62035221-RA	CqBBX03	CGTCA-motif	CGTCA	cis-acting regulatory element involved in the MeJA-responsiveness	Phytohormone responsiveness
AUR62035221-RA	CqBBX03	P-box	CCTTTTG	gibberellin-responsive element	Phytohormone responsiveness
AUR62035221-RA	CqBBX03	TGACG-motif	TGACG	cis-acting regulatory element involved in the MeJA-responsiveness	Phytohormone responsiveness
AUR62035221-RA	CqBBX03	TGA-element	AACGAC	auxin-responsive element	Phytohormone responsiveness
AUR62041089-RA	CqBBX04	ABRE	ACGTG	cis-acting element involved in the abscisic acid responsiveness	Phytohormone responsiveness
AUR62041089-RA	CqBBX04	ABRE	ACGTG	cis-acting element involved in the abscisic acid responsiveness	Phytohormone responsiveness
AUR62041089-RA	CqBBX04	ABRE	TACGGTC	cis-acting element involved in the abscisic acid responsiveness	Phytohormone responsiveness
AUR62041089-RA	CqBBX04	ABRE	ACGTG	cis-acting element involved in the abscisic acid responsiveness	Phytohormone responsiveness
AUR62041089-RA	CqBBX04	ABRE	ACGTG	cis-acting element involved in the abscisic acid responsiveness	Phytohormone responsiveness
AUR62002328-RA	CqBBX05	GARE-motif	TCTGTTG	gibberellin-responsive element	Phytohormone responsiveness
AUR62002328-RA	CqBBX05	TCA-element	CCATCTTTTT	cis-acting element involved in salicylic acid responsiveness	Phytohormone responsiveness
AUR62002328-RA	CqBBX05	TGA-element	AACGAC	auxin-responsive element	Phytohormone responsiveness
AUR62030805-RA	CqBBX07	ABRE	CGTACGTGCA	cis-acting element involved in the abscisic acid responsiveness	Phytohormone responsiveness
AUR62030805-RA	CqBBX07	CGTCA-motif	CGTCA	cis-acting regulatory element involved in the MeJA-responsiveness	Phytohormone responsiveness
AUR62030805-RA	CqBBX07	GARE-motif	TCTGTTG	gibberellin-responsive element	Phytohormone responsiveness
AUR62030805-RA	CqBBX07	GARE-motif	TCTGTTG	gibberellin-responsive element	Phytohormone responsiveness
AUR62030805-RA	CqBBX07	GARE-motif	TCTGTTG	gibberellin-responsive element	Phytohormone responsiveness
AUR62030805-RA	CqBBX07	GARE-motif	TCTGTTG	gibberellin-responsive element	Phytohormone responsiveness
AUR62030805-RA	CqBBX07	TGACG-motif	TGACG	cis-acting regulatory element involved in the MeJA-responsiveness	Phytohormone responsiveness
AUR62040293-RA	CqBBX08	ABRE	ACGTG	cis-acting element involved in the abscisic acid responsiveness	Phytohormone responsiveness
AUR62040293-RA	CqBBX08	ABRE	GACACGTGGC	cis-acting element involved in the abscisic acid responsiveness	Phytohormone responsiveness
AUR62040293-RA	CqBBX08	ABRE	CACGTG	cis-acting element involved in the abscisic acid responsiveness	Phytohormone responsiveness
AUR62040293-RA	CqBBX08	ABRE	ACGTG	cis-acting element involved in the abscisic acid responsiveness	Phytohormone responsiveness
AUR62040293-RA	CqBBX08	ABRE	CACGTG	cis-acting element involved in the abscisic acid responsiveness	Phytohormone responsiveness
AUR62040293-RA	CqBBX08	ABRE	ACGTG	cis-acting element involved in the abscisic acid responsiveness	Phytohormone responsiveness
AUR62040293-RA	CqBBX08	ABRE	CACGTG	cis-acting element involved in the abscisic acid responsiveness	Phytohormone responsiveness
AUR62040293-RA	CqBBX08	ABRE	ACGTG	cis-acting element involved in the abscisic acid responsiveness	Phytohormone responsiveness
AUR62040293-RA	CqBBX08	ABRE	GACACGTGGC	cis-acting element involved in the abscisic acid responsiveness	Phytohormone responsiveness
AUR62040293-RA	CqBBX08	ABRE	CACGTG	cis-acting element involved in the abscisic acid responsiveness	Phytohormone responsiveness
AUR62040293-RA	CqBBX08	ABRE	ACGTG	cis-acting element involved in the abscisic acid responsiveness	Phytohormone responsiveness
AUR62040293-RA	CqBBX08	CGTCA-motif	CGTCA	cis-acting regulatory element involved in the MeJA-responsiveness	Phytohormone responsiveness
AUR62040293-RA	CqBBX08	CGTCA-motif	CGTCA	cis-acting regulatory element involved in the MeJA-responsiveness	Phytohormone responsiveness
AUR62040293-RA	CqBBX08	GARE-motif	TCTGTTG	gibberellin-responsive element	Phytohormone responsiveness
AUR62040293-RA	CqBBX08	P-box	CCTTTTG	gibberellin-responsive element	Phytohormone responsiveness
AUR62040293-RA	CqBBX08	TCA-element	TCAGAAGAGG	cis-acting element involved in salicylic acid responsiveness	Phytohormone responsiveness
AUR62040293-RA	CqBBX08	TGACG-motif	TGACG	cis-acting regulatory element involved in the MeJA-responsiveness	Phytohormone responsiveness
AUR62040293-RA	CqBBX08	TGACG-motif	TGACG	cis-acting regulatory element involved in the MeJA-responsiveness	Phytohormone responsiveness
AUR62037849-RA	CqBBX09	ABRE	ACGTG	cis-acting element involved in the abscisic acid responsiveness	Phytohormone responsiveness
AUR62037849-RA	CqBBX09	ABRE	ACGTG	cis-acting element involved in the abscisic acid responsiveness	Phytohormone responsiveness
AUR62037849-RA	CqBBX09	CGTCA-motif	CGTCA	cis-acting regulatory element involved in the MeJA-responsiveness	Phytohormone responsiveness
AUR62037849-RA	CqBBX09	CGTCA-motif	CGTCA	cis-acting regulatory element involved in the MeJA-responsiveness	Phytohormone responsiveness
AUR62037849-RA	CqBBX09	CGTCA-motif	CGTCA	cis-acting regulatory element involved in the MeJA-responsiveness	Phytohormone responsiveness
AUR62037849-RA	CqBBX09	GARE-motif	TCTGTTG	gibberellin-responsive element	Phytohormone responsiveness
AUR62037849-RA	CqBBX09	GARE-motif	TCTGTTG	gibberellin-responsive element	Phytohormone responsiveness
AUR62037849-RA	CqBBX09	P-box	CCTTTTG	gibberellin-responsive element	Phytohormone responsiveness
AUR62037849-RA	CqBBX09	TATC-box	TATCCCA	cis-acting element involved in gibberellin-responsiveness	Phytohormone responsiveness
AUR62037849-RA	CqBBX09	TGACG-motif	TGACG	cis-acting regulatory element involved in the MeJA-responsiveness	Phytohormone responsiveness
AUR62037849-RA	CqBBX09	TGACG-motif	TGACG	cis-acting regulatory element involved in the MeJA-responsiveness	Phytohormone responsiveness
AUR62037849-RA	CqBBX09	TGACG-motif	TGACG	cis-acting regulatory element involved in the MeJA-responsiveness	Phytohormone responsiveness
AUR62009440-RA	CqBBX10	ABRE	CACGTG	cis-acting element involved in the abscisic acid responsiveness	Phytohormone responsiveness
AUR62009440-RA	CqBBX10	ABRE	ACGTG	cis-acting element involved in the abscisic acid responsiveness	Phytohormone responsiveness
AUR62009440-RA	CqBBX10	ABRE	GCAACGTGTC	cis-acting element involved in the abscisic acid responsiveness	Phytohormone responsiveness
AUR62009440-RA	CqBBX10	ABRE	CACGTG	cis-acting element involved in the abscisic acid responsiveness	Phytohormone responsiveness
AUR62009440-RA	CqBBX10	ABRE	ACGTG	cis-acting element involved in the abscisic acid responsiveness	Phytohormone responsiveness
AUR62009440-RA	CqBBX10	P-box	CCTTTTG	gibberellin-responsive element	Phytohormone responsiveness
AUR62009440-RA	CqBBX10	TCA-element	CCATCTTTTT	cis-acting element involved in salicylic acid responsiveness	Phytohormone responsiveness
AUR62023118-RA	CqBBX11	ABRE	ACGTG	cis-acting element involved in the abscisic acid responsiveness	Phytohormone responsiveness
AUR62023118-RA	CqBBX11	ABRE	CACGTG	cis-acting element involved in the abscisic acid responsiveness	Phytohormone responsiveness
AUR62023118-RA	CqBBX11	ABRE	ACGTG	cis-acting element involved in the abscisic acid responsiveness	Phytohormone responsiveness
AUR62023118-RA	CqBBX11	ABRE	GCAACGTGTC	cis-acting element involved in the abscisic acid responsiveness	Phytohormone responsiveness
AUR62023118-RA	CqBBX11	ABRE	CACGTG	cis-acting element involved in the abscisic acid responsiveness	Phytohormone responsiveness
AUR62023118-RA	CqBBX11	ABRE	ACGTG	cis-acting element involved in the abscisic acid responsiveness	Phytohormone responsiveness
AUR62023118-RA	CqBBX11	P-box	CCTTTTG	gibberellin-responsive element	Phytohormone responsiveness
AUR62037140-RA	CqBBX12	ABRE	CACGTG	cis-acting element involved in the abscisic acid responsiveness	Phytohormone responsiveness
AUR62037140-RA	CqBBX12	ABRE	ACGTG	cis-acting element involved in the abscisic acid responsiveness	Phytohormone responsiveness
AUR62037140-RA	CqBBX12	ABRE	AACCCGG	cis-acting element involved in the abscisic acid responsiveness	Phytohormone responsiveness
AUR62037140-RA	CqBBX12	CGTCA-motif	CGTCA	cis-acting regulatory element involved in the MeJA-responsiveness	Phytohormone responsiveness
AUR62037140-RA	CqBBX12	GARE-motif	TCTGTTG	gibberellin-responsive element	Phytohormone responsiveness
AUR62037140-RA	CqBBX12	GARE-motif	TCTGTTG	gibberellin-responsive element	Phytohormone responsiveness
AUR62037140-RA	CqBBX12	GARE-motif	TCTGTTG	gibberellin-responsive element	Phytohormone responsiveness
AUR62037140-RA	CqBBX12	GARE-motif	TCTGTTG	gibberellin-responsive element	Phytohormone responsiveness
AUR62037140-RA	CqBBX12	GARE-motif	TCTGTTG	gibberellin-responsive element	Phytohormone responsiveness
AUR62037140-RA	CqBBX12	P-box	CCTTTTG	gibberellin-responsive element	Phytohormone responsiveness
AUR62037140-RA	CqBBX12	TCA-element	CCATCTTTTT	cis-acting element involved in salicylic acid responsiveness	Phytohormone responsiveness
AUR62037140-RA	CqBBX12	TGACG-motif	TGACG	cis-acting regulatory element involved in the MeJA-responsiveness	Phytohormone responsiveness
AUR62034563-RA	CqBBX13	ABRE	ACGTG	cis-acting element involved in the abscisic acid responsiveness	Phytohormone responsiveness
AUR62034563-RA	CqBBX13	ABRE	ACGTG	cis-acting element involved in the abscisic acid responsiveness	Phytohormone responsiveness
AUR62034563-RA	CqBBX13	CGTCA-motif	CGTCA	cis-acting regulatory element involved in the MeJA-responsiveness	Phytohormone responsiveness
AUR62034563-RA	CqBBX13	CGTCA-motif	CGTCA	cis-acting regulatory element involved in the MeJA-responsiveness	Phytohormone responsiveness
AUR62034563-RA	CqBBX13	TGACG-motif	TGACG	cis-acting regulatory element involved in the MeJA-responsiveness	Phytohormone responsiveness
AUR62034563-RA	CqBBX13	TGACG-motif	TGACG	cis-acting regulatory element involved in the MeJA-responsiveness	Phytohormone responsiveness
AUR62034563-RA	CqBBX13	TGA-element	AACGAC	auxin-responsive element	Phytohormone responsiveness
AUR62034638-RA	CqBBX14	ABRE	GACACGTGGC	cis-acting element involved in the abscisic acid responsiveness	Phytohormone responsiveness
AUR62034638-RA	CqBBX14	ABRE	GACACGTGGC	cis-acting element involved in the abscisic acid responsiveness	Phytohormone responsiveness
AUR62034638-RA	CqBBX14	TATC-box	TATCCCA	cis-acting element involved in gibberellin-responsiveness	Phytohormone responsiveness
AUR62034638-RA	CqBBX14	TGA-element	AACGAC	auxin-responsive element	Phytohormone responsiveness
AUR62002867-RA	CqBBX16	ABRE	ACGTG	cis-acting element involved in the abscisic acid responsiveness	Phytohormone responsiveness
AUR62002867-RA	CqBBX16	CGTCA-motif	CGTCA	cis-acting regulatory element involved in the MeJA-responsiveness	Phytohormone responsiveness
AUR62002867-RA	CqBBX16	TGACG-motif	TGACG	cis-acting regulatory element involved in the MeJA-responsiveness	Phytohormone responsiveness
AUR62002867-RA	CqBBX16	TGA-element	AACGAC	auxin-responsive element	Phytohormone responsiveness
AUR62002793-RA	CqBBX17	ABRE	ACGTG	cis-acting element involved in the abscisic acid responsiveness	Phytohormone responsiveness
AUR62002793-RA	CqBBX17	ABRE	ACGTG	cis-acting element involved in the abscisic acid responsiveness	Phytohormone responsiveness
AUR62002793-RA	CqBBX17	CGTCA-motif	CGTCA	cis-acting regulatory element involved in the MeJA-responsiveness	Phytohormone responsiveness
AUR62002793-RA	CqBBX17	TATC-box	TATCCCA	cis-acting element involved in gibberellin-responsiveness	Phytohormone responsiveness
AUR62002793-RA	CqBBX17	TGACG-motif	TGACG	cis-acting regulatory element involved in the MeJA-responsiveness	Phytohormone responsiveness
AUR62014436-RA	CqBBX18	ABRE	ACGTG	cis-acting element involved in the abscisic acid responsiveness	Phytohormone responsiveness
AUR62014436-RA	CqBBX18	ABRE	ACGTG	cis-acting element involved in the abscisic acid responsiveness	Phytohormone responsiveness
AUR62014436-RA	CqBBX18	CGTCA-motif	CGTCA	cis-acting regulatory element involved in the MeJA-responsiveness	Phytohormone responsiveness
AUR62014436-RA	CqBBX18	TGACG-motif	TGACG	cis-acting regulatory element involved in the MeJA-responsiveness	Phytohormone responsiveness
AUR62014436-RA	CqBBX18	TGA-element	AACGAC	auxin-responsive element	Phytohormone responsiveness
AUR62039579-RA	CqBBX19	GARE-motif	TCTGTTG	gibberellin-responsive element	Phytohormone responsiveness
AUR62016801-RA	CqBBX20	CGTCA-motif	CGTCA	cis-acting regulatory element involved in the MeJA-responsiveness	Phytohormone responsiveness
AUR62016801-RA	CqBBX20	TATC-box	TATCCCA	cis-acting element involved in gibberellin-responsiveness	Phytohormone responsiveness
AUR62016801-RA	CqBBX20	TCA-element	CCATCTTTTT	cis-acting element involved in salicylic acid responsiveness	Phytohormone responsiveness
AUR62016801-RA	CqBBX20	TGACG-motif	TGACG	cis-acting regulatory element involved in the MeJA-responsiveness	Phytohormone responsiveness
AUR62016828-RA	CqBBX21	ABRE	CACGTG	cis-acting element involved in the abscisic acid responsiveness	Phytohormone responsiveness
AUR62016828-RA	CqBBX21	ABRE	ACGTG	cis-acting element involved in the abscisic acid responsiveness	Phytohormone responsiveness
AUR62016828-RA	CqBBX21	ABRE	ACGTG	cis-acting element involved in the abscisic acid responsiveness	Phytohormone responsiveness
AUR62016828-RA	CqBBX21	ABRE	ACGTG	cis-acting element involved in the abscisic acid responsiveness	Phytohormone responsiveness
AUR62016828-RA	CqBBX21	CGTCA-motif	CGTCA	cis-acting regulatory element involved in the MeJA-responsiveness	Phytohormone responsiveness
AUR62016828-RA	CqBBX21	CGTCA-motif	CGTCA	cis-acting regulatory element involved in the MeJA-responsiveness	Phytohormone responsiveness
AUR62016828-RA	CqBBX21	CGTCA-motif	CGTCA	cis-acting regulatory element involved in the MeJA-responsiveness	Phytohormone responsiveness
AUR62016828-RA	CqBBX21	CGTCA-motif	CGTCA	cis-acting regulatory element involved in the MeJA-responsiveness	Phytohormone responsiveness
AUR62016828-RA	CqBBX21	TGACG-motif	TGACG	cis-acting regulatory element involved in the MeJA-responsiveness	Phytohormone responsiveness
AUR62016828-RA	CqBBX21	TGACG-motif	TGACG	cis-acting regulatory element involved in the MeJA-responsiveness	Phytohormone responsiveness
AUR62016828-RA	CqBBX21	TGACG-motif	TGACG	cis-acting regulatory element involved in the MeJA-responsiveness	Phytohormone responsiveness
AUR62016828-RA	CqBBX21	TGACG-motif	TGACG	cis-acting regulatory element involved in the MeJA-responsiveness	Phytohormone responsiveness
AUR62014102-RA	CqBBX22	ABRE	ACGTG	cis-acting element involved in the abscisic acid responsiveness	Phytohormone responsiveness
AUR62014102-RA	CqBBX22	ABRE	ACGTG	cis-acting element involved in the abscisic acid responsiveness	Phytohormone responsiveness
AUR62041163-RA	CqBBX23	ABRE	ACGTG	cis-acting element involved in the abscisic acid responsiveness	Phytohormone responsiveness
AUR62041163-RA	CqBBX23	ABRE	ACGTG	cis-acting element involved in the abscisic acid responsiveness	Phytohormone responsiveness
AUR62041163-RA	CqBBX23	ABRE	GACACGTGGC	cis-acting element involved in the abscisic acid responsiveness	Phytohormone responsiveness
AUR62041163-RA	CqBBX23	ABRE	CACGTG	cis-acting element involved in the abscisic acid responsiveness	Phytohormone responsiveness
AUR62041163-RA	CqBBX23	ABRE	ACGTG	cis-acting element involved in the abscisic acid responsiveness	Phytohormone responsiveness
AUR62041163-RA	CqBBX23	ABRE	ACGTG	cis-acting element involved in the abscisic acid responsiveness	Phytohormone responsiveness
AUR62041163-RA	CqBBX23	ABRE	GCAACGTGTC	cis-acting element involved in the abscisic acid responsiveness	Phytohormone responsiveness
AUR62041163-RA	CqBBX23	ABRE	CACGTG	cis-acting element involved in the abscisic acid responsiveness	Phytohormone responsiveness
AUR62041163-RA	CqBBX23	ABRE	ACGTG	cis-acting element involved in the abscisic acid responsiveness	Phytohormone responsiveness
AUR62041163-RA	CqBBX23	CGTCA-motif	CGTCA	cis-acting regulatory element involved in the MeJA-responsiveness	Phytohormone responsiveness
AUR62041163-RA	CqBBX23	CGTCA-motif	CGTCA	cis-acting regulatory element involved in the MeJA-responsiveness	Phytohormone responsiveness
AUR62041163-RA	CqBBX23	TGACG-motif	TGACG	cis-acting regulatory element involved in the MeJA-responsiveness	Phytohormone responsiveness
AUR62041163-RA	CqBBX23	TGACG-motif	TGACG	cis-acting regulatory element involved in the MeJA-responsiveness	Phytohormone responsiveness
AUR62041163-RA	CqBBX23	TGA-element	AACGAC	auxin-responsive element	Phytohormone responsiveness
AUR62025058-RA	CqBBX24	ABRE	AACCCGG	cis-acting element involved in the abscisic acid responsiveness	Phytohormone responsiveness
AUR62025058-RA	CqBBX24	ABRE	AACCCGG	cis-acting element involved in the abscisic acid responsiveness	Phytohormone responsiveness
AUR62025058-RA	CqBBX24	ABRE	GCAACGTGTC	cis-acting element involved in the abscisic acid responsiveness	Phytohormone responsiveness
AUR62025058-RA	CqBBX24	ABRE	ACGTG	cis-acting element involved in the abscisic acid responsiveness	Phytohormone responsiveness
AUR62025058-RA	CqBBX24	CGTCA-motif	CGTCA	cis-acting regulatory element involved in the MeJA-responsiveness	Phytohormone responsiveness
AUR62025058-RA	CqBBX24	GARE-motif	TCTGTTG	gibberellin-responsive element	Phytohormone responsiveness
AUR62025058-RA	CqBBX24	GARE-motif	TCTGTTG	gibberellin-responsive element	Phytohormone responsiveness
AUR62025058-RA	CqBBX24	GARE-motif	TCTGTTG	gibberellin-responsive element	Phytohormone responsiveness
AUR62025058-RA	CqBBX24	P-box	CCTTTTG	gibberellin-responsive element	Phytohormone responsiveness
AUR62025058-RA	CqBBX24	TCA-element	CCATCTTTTT	cis-acting element involved in salicylic acid responsiveness	Phytohormone responsiveness
AUR62025058-RA	CqBBX24	TGACG-motif	TGACG	cis-acting regulatory element involved in the MeJA-responsiveness	Phytohormone responsiveness
AUR62039984-RA	CqBBX25	ABRE	CACGTG	cis-acting element involved in the abscisic acid responsiveness	Phytohormone responsiveness
AUR62039984-RA	CqBBX25	ABRE	ACGTG	cis-acting element involved in the abscisic acid responsiveness	Phytohormone responsiveness
AUR62039984-RA	CqBBX25	ABRE	ACGTG	cis-acting element involved in the abscisic acid responsiveness	Phytohormone responsiveness
AUR62039984-RA	CqBBX25	ABRE	GACACGTGGC	cis-acting element involved in the abscisic acid responsiveness	Phytohormone responsiveness
AUR62039984-RA	CqBBX25	ABRE	CACGTG	cis-acting element involved in the abscisic acid responsiveness	Phytohormone responsiveness
AUR62039984-RA	CqBBX25	ABRE	ACGTG	cis-acting element involved in the abscisic acid responsiveness	Phytohormone responsiveness
AUR62039984-RA	CqBBX25	CGTCA-motif	CGTCA	cis-acting regulatory element involved in the MeJA-responsiveness	Phytohormone responsiveness
AUR62039984-RA	CqBBX25	CGTCA-motif	CGTCA	cis-acting regulatory element involved in the MeJA-responsiveness	Phytohormone responsiveness
AUR62039984-RA	CqBBX25	P-box	CCTTTTG	gibberellin-responsive element	Phytohormone responsiveness
AUR62039984-RA	CqBBX25	TCA-element	CCATCTTTTT	cis-acting element involved in salicylic acid responsiveness	Phytohormone responsiveness
AUR62039984-RA	CqBBX25	TGACG-motif	TGACG	cis-acting regulatory element involved in the MeJA-responsiveness	Phytohormone responsiveness
AUR62039984-RA	CqBBX25	TGACG-motif	TGACG	cis-acting regulatory element involved in the MeJA-responsiveness	Phytohormone responsiveness
AUR62001354-RA	CqBBX26	ABRE	ACGTG	cis-acting element involved in the abscisic acid responsiveness	Phytohormone responsiveness
AUR62001354-RA	CqBBX26	ABRE	GCAACGTGTC	cis-acting element involved in the abscisic acid responsiveness	Phytohormone responsiveness
AUR62001354-RA	CqBBX26	ABRE	ACGTG	cis-acting element involved in the abscisic acid responsiveness	Phytohormone responsiveness
AUR62001354-RA	CqBBX26	ABRE	CACGTG	cis-acting element involved in the abscisic acid responsiveness	Phytohormone responsiveness
AUR62001354-RA	CqBBX26	ABRE	ACGTG	cis-acting element involved in the abscisic acid responsiveness	Phytohormone responsiveness
AUR62001354-RA	CqBBX26	ABRE	TACGGTC	cis-acting element involved in the abscisic acid responsiveness	Phytohormone responsiveness
AUR62001354-RA	CqBBX26	ABRE	GACACGTGGC	cis-acting element involved in the abscisic acid responsiveness	Phytohormone responsiveness
AUR62001354-RA	CqBBX26	CGTCA-motif	CGTCA	cis-acting regulatory element involved in the MeJA-responsiveness	Phytohormone responsiveness
AUR62001354-RA	CqBBX26	TATC-box	TATCCCA	cis-acting element involved in gibberellin-responsiveness	Phytohormone responsiveness
AUR62001354-RA	CqBBX26	TCA-element	CCATCTTTTT	cis-acting element involved in salicylic acid responsiveness	Phytohormone responsiveness
AUR62001354-RA	CqBBX26	TCA-element	CCATCTTTTT	cis-acting element involved in salicylic acid responsiveness	Phytohormone responsiveness
AUR62001354-RA	CqBBX26	TGACG-motif	TGACG	cis-acting regulatory element involved in the MeJA-responsiveness	Phytohormone responsiveness
AUR62008578-RA	CqBBX27	ABRE	ACGTG	cis-acting element involved in the abscisic acid responsiveness	Phytohormone responsiveness
AUR62008578-RA	CqBBX27	CGTCA-motif	CGTCA	cis-acting regulatory element involved in the MeJA-responsiveness	Phytohormone responsiveness
AUR62008578-RA	CqBBX27	TATC-box	TATCCCA	cis-acting element involved in gibberellin-responsiveness	Phytohormone responsiveness
AUR62008578-RA	CqBBX27	TGACG-motif	TGACG	cis-acting regulatory element involved in the MeJA-responsiveness	Phytohormone responsiveness
AUR62025650-RA	CqBBX28	ABRE	ACGTG	cis-acting element involved in the abscisic acid responsiveness	Phytohormone responsiveness
AUR62025650-RA	CqBBX28	ABRE	CACGTG	cis-acting element involved in the abscisic acid responsiveness	Phytohormone responsiveness
AUR62025650-RA	CqBBX28	ABRE	ACGTG	cis-acting element involved in the abscisic acid responsiveness	Phytohormone responsiveness
AUR62025650-RA	CqBBX28	ABRE	ACGTG	cis-acting element involved in the abscisic acid responsiveness	Phytohormone responsiveness
AUR62025650-RA	CqBBX28	ABRE	ACGTG	cis-acting element involved in the abscisic acid responsiveness	Phytohormone responsiveness
AUR62025650-RA	CqBBX28	ABRE	ACGTG	cis-acting element involved in the abscisic acid responsiveness	Phytohormone responsiveness
AUR62025650-RA	CqBBX28	ABRE	TACGGTC	cis-acting element involved in the abscisic acid responsiveness	Phytohormone responsiveness
AUR62025650-RA	CqBBX28	ABRE	ACGTG	cis-acting element involved in the abscisic acid responsiveness	Phytohormone responsiveness
AUR62030486-RA	CqBBX29	GARE-motif	TCTGTTG	gibberellin-responsive element	Phytohormone responsiveness
AUR62030486-RA	CqBBX29	GARE-motif	TCTGTTG	gibberellin-responsive element	Phytohormone responsiveness
AUR62030486-RA	CqBBX29	TATC-box	TATCCCA	cis-acting element involved in gibberellin-responsiveness	Phytohormone responsiveness
AUR62010415-RA	CqBBX30	AuxRR-core	GGTCCAT	cis-acting regulatory element involved in auxin responsiveness	Phytohormone responsiveness
AUR62010415-RA	CqBBX30	TCA-element	CCATCTTTTT	cis-acting element involved in salicylic acid responsiveness	Phytohormone responsiveness
AUR62010390-RA	CqBBX31	GARE-motif	TCTGTTG	gibberellin-responsive element	Phytohormone responsiveness
AUR62010390-RA	CqBBX31	GARE-motif	TCTGTTG	gibberellin-responsive element	Phytohormone responsiveness
AUR62010390-RA	CqBBX31	TCA-element	CCATCTTTTT	cis-acting element involved in salicylic acid responsiveness	Phytohormone responsiveness
AUR62008578-RA	CqBBX01	RY-element	CATGCATG	cis-acting regulatory element involved in seed-specific regulation	Tissue-specific expression
AUR62023859-RA	CqBBX02	CAT-box	GCCACT	cis-acting regulatory element related to meristem expression	Tissue-specific expression
AUR62037849-RA	CqBBX02	GCN4_motif	TGAGTCA	cis-regulatory element involved in endosperm expression	Tissue-specific expression
AUR62034638-RA	CqBBX02	HD-Zip 1	CAAT(A/T)ATTG	element involved in differentiation of the palisade mesophyll cells	Tissue-specific expression
AUR62020307-RA	CqBBX03	HD-Zip 1	CAAT(A/T)ATTG	element involved in differentiation of the palisade mesophyll cells	Tissue-specific expression
AUR62016828-RA	CqBBX03	O2-site	GATGATGTGG	cis-acting regulatory element involved in zein metabolism regulation	Tissue-specific expression
AUR62035217-RA	CqBBX04	CAT-box	GCCACT	cis-acting regulatory element related to meristem expression	Tissue-specific expression
AUR62035217-RA	CqBBX04	CAT-box	GCCACT	cis-acting regulatory element related to meristem expression	Tissue-specific expression
AUR62037849-RA	CqBBX05	GCN4_motif	TGAGTCA	cis-regulatory element involved in endosperm expression	Tissue-specific expression
AUR62008578-RA	CqBBX05	RY-element	CATGCATG	cis-acting regulatory element involved in seed-specific regulation	Tissue-specific expression
AUR62035217-RA	CqBBX06	CAT-box	GCCACT	cis-acting regulatory element related to meristem expression	Tissue-specific expression
AUR62035221-RA	CqBBX06	CAT-box	GCCACT	cis-acting regulatory element related to meristem expression	Tissue-specific expression
AUR62002867-RA	CqBBX07	HD-Zip 1	CAAT(A/T)ATTG	element involved in differentiation of the palisade mesophyll cells	Tissue-specific expression
AUR62016828-RA	CqBBX08	O2-site	GATGATGTGG	cis-acting regulatory element involved in zein metabolism regulation	Tissue-specific expression
AUR62025650-RA	CqBBX08	RY-element	CATGCATG	cis-acting regulatory element involved in seed-specific regulation	Tissue-specific expression
AUR62025650-RA	CqBBX08	RY-element	CATGCATG	cis-acting regulatory element involved in seed-specific regulation	Tissue-specific expression
AUR62035221-RA	CqBBX09	CAT-box	GCCACT	cis-acting regulatory element related to meristem expression	Tissue-specific expression
AUR62041089-RA	CqBBX09	CAT-box	GCCACT	cis-acting regulatory element related to meristem expression	Tissue-specific expression
AUR62041089-RA	CqBBX09	CAT-box	GCCACT	cis-acting regulatory element related to meristem expression	Tissue-specific expression
AUR62014102-RA	CqBBX09	O2-site	GATGATGTGG	cis-acting regulatory element involved in zein metabolism regulation	Tissue-specific expression
AUR62010390-RA	CqBBX09	RY-element	CATGCATG	cis-acting regulatory element involved in seed-specific regulation	Tissue-specific expression
AUR62002328-RA	CqBBX10	CAT-box	GCCACT	cis-acting regulatory element related to meristem expression	Tissue-specific expression
AUR62037849-RA	CqBBX10	GCN4_motif	TGAGTCA	cis-regulatory element involved in endosperm expression	Tissue-specific expression
AUR62009440-RA	CqBBX10	GCN4_motif	TGAGTCA	cis-regulatory element involved in endosperm expression	Tissue-specific expression
AUR62009440-RA	CqBBX10	GCN4_motif	TGAGTCA	cis-regulatory element involved in endosperm expression	Tissue-specific expression
AUR62002867-RA	CqBBX10	HD-Zip 1	CAAT(A/T)ATTG	element involved in differentiation of the palisade mesophyll cells	Tissue-specific expression
AUR62002328-RA	CqBBX11	CAT-box	GCCACT	cis-acting regulatory element related to meristem expression	Tissue-specific expression
AUR62009440-RA	CqBBX11	GCN4_motif	TGAGTCA	cis-regulatory element involved in endosperm expression	Tissue-specific expression
AUR62009440-RA	CqBBX11	GCN4_motif	TGAGTCA	cis-regulatory element involved in endosperm expression	Tissue-specific expression
AUR62002793-RA	CqBBX11	HD-Zip 1	CAAT(A/T)ATTG	element involved in differentiation of the palisade mesophyll cells	Tissue-specific expression
AUR62039579-RA	CqBBX14	MBSI	aaaAaaC(G/C)GTTA	MYB binding site involved in flavonoid biosynthetic genes regulation	Tissue-specific expression
AUR62019649-RA	CqBBX15	CAT-box	GCCACT	cis-acting regulatory element related to meristem expression	Tissue-specific expression
AUR62002793-RA	CqBBX16	HD-Zip 1	CAAT(A/T)ATTG	element involved in differentiation of the palisade mesophyll cells	Tissue-specific expression
AUR62010390-RA	CqBBX16	RY-element	CATGCATG	cis-acting regulatory element involved in seed-specific regulation	Tissue-specific expression
AUR62014102-RA	CqBBX17	O2-site	GATGACATGG	cis-acting regulatory element involved in zein metabolism regulation	Tissue-specific expression
AUR62014102-RA	CqBBX17	O2-site	GATGACATGG	cis-acting regulatory element involved in zein metabolism regulation	Tissue-specific expression
AUR62014102-RA	CqBBX17	O2-site	GATGATGTGG	cis-acting regulatory element involved in zein metabolism regulation	Tissue-specific expression
AUR62041163-RA	CqBBX17	O2-site	GATGACATGG	cis-acting regulatory element involved in zein metabolism regulation	Tissue-specific expression
AUR62040293-RA	CqBBX19	GC-motif	CCCCCG	enhancer-like element involved in anoxic specific inducibility	Tissue-specific expression
AUR62041163-RA	CqBBX19	O2-site	GATGA(C/T)(A/G)TG(A/G)	cis-acting regulatory element involved in zein metabolism regulation	Tissue-specific expression
AUR62019649-RA	CqBBX20	CAT-box	GCCACT	cis-acting regulatory element related to meristem expression	Tissue-specific expression
AUR62009440-RA	CqBBX20	GCN4_motif	TGAGTCA	cis-regulatory element involved in endosperm expression	Tissue-specific expression
AUR62039579-RA	CqBBX20	MBSI	aaaAaaC(G/C)GTTA	MYB binding site involved in flavonoid biosynthetic genes regulation	Tissue-specific expression
AUR62037849-RA	CqBBX21	GC-motif	CCCCCG	enhancer-like element involved in anoxic specific inducibility	Tissue-specific expression
AUR62037849-RA	CqBBX21	GC-motif	CCCCCG	enhancer-like element involved in anoxic specific inducibility	Tissue-specific expression
AUR62041163-RA	CqBBX22	O2-site	GATGA(C/T)(A/G)TG(A/G)	cis-acting regulatory element involved in zein metabolism regulation	Tissue-specific expression
AUR62041163-RA	CqBBX22	O2-site	GATGACATGG	cis-acting regulatory element involved in zein metabolism regulation	Tissue-specific expression
AUR62041163-RA	CqBBX22	O2-site	GATGATGTGG	cis-acting regulatory element involved in zein metabolism regulation	Tissue-specific expression
AUR62041163-RA	CqBBX22	O2-site	GTTGACGTGA	cis-acting regulatory element involved in zein metabolism regulation	Tissue-specific expression
AUR62030805-RA	CqBBX23	CAT-box	GCCACT	cis-acting regulatory element related to meristem expression	Tissue-specific expression
AUR62002793-RA	CqBBX23	HD-Zip 1	CAAT(A/T)ATTG	element involved in differentiation of the palisade mesophyll cells	Tissue-specific expression
AUR62016801-RA	CqBBX23	MSA-like	(T/C)C(T/C)AACGG(T/C)(T/C)A	cis-acting element involved in cell cycle regulation	Tissue-specific expression
AUR62039984-RA	CqBBX23	O2-site	GATGA(C/T)(A/G)TG(A/G)	cis-acting regulatory element involved in zein metabolism regulation	Tissue-specific expression
AUR62039984-RA	CqBBX23	O2-site	GATGA(C/T)(A/G)TG(A/G)	cis-acting regulatory element involved in zein metabolism regulation	Tissue-specific expression
AUR62001354-RA	CqBBX23	O2-site	GATGATGTGG	cis-acting regulatory element involved in zein metabolism regulation	Tissue-specific expression
AUR62016801-RA	CqBBX25	MBSI	aaaAaaC(G/C)GTTA	MYB binding site involved in flavonoid biosynthetic genes regulation	Tissue-specific expression
AUR62016801-RA	CqBBX25	MSA-like	TCAAACGGT	cis-acting element involved in cell cycle regulation	Tissue-specific expression
AUR62023118-RA	CqBBX26	GCN4_motif	TGAGTCA	cis-regulatory element involved in endosperm expression	Tissue-specific expression
AUR62002793-RA	CqBBX26	HD-Zip 1	CAAT(A/T)ATTG	element involved in differentiation of the palisade mesophyll cells	Tissue-specific expression
AUR62040293-RA	CqBBX27	CAT-box	GCCACT	cis-acting regulatory element related to meristem expression	Tissue-specific expression
AUR62023118-RA	CqBBX27	GCN4_motif	TGAGTCA	cis-regulatory element involved in endosperm expression	Tissue-specific expression
AUR62023118-RA	CqBBX27	GCN4_motif	TGAGTCA	cis-regulatory element involved in endosperm expression	Tissue-specific expression
AUR62023118-RA	CqBBX28	GCN4_motif	TGAGTCA	cis-regulatory element involved in endosperm expression	Tissue-specific expression
AUR62001354-RA	CqBBX28	O2-site	GATGA(C/T)(A/G)TG(A/G)	cis-acting regulatory element involved in zein metabolism regulation	Tissue-specific expression
AUR62040293-RA	CqBBX31	CAT-box	GCCACT	cis-acting regulatory element related to meristem expression	Tissue-specific expression
AUR62008578-RA	CqBBX31	O2-site	GATGA(C/T)(A/G)TG(A/G)	cis-acting regulatory element involved in zein metabolism regulation	Tissue-specific expression
AUR62023859-RA	CqBBX01	ARE	AAACCA	cis-acting regulatory element essential for the anaerobic induction	Stress responsiveness
AUR62023859-RA	CqBBX01	ARE	AAACCA	cis-acting regulatory element essential for the anaerobic induction	Stress responsiveness
AUR62023859-RA	CqBBX01	MBS	CAACTG	MYB binding site involved in drought-inducibility	Stress responsiveness
AUR62023859-RA	CqBBX01	MBS	CAACTG	MYB binding site involved in drought-inducibility	Stress responsiveness
AUR62023859-RA	CqBBX01	TC-rich repeats	ATTCTCTAAC	cis-acting element involved in defense and stress responsiveness	Stress responsiveness
AUR62035217-RA	CqBBX02	ARE	AAACCA	cis-acting regulatory element essential for the anaerobic induction	Stress responsiveness
AUR62035217-RA	CqBBX02	ARE	AAACCA	cis-acting regulatory element essential for the anaerobic induction	Stress responsiveness
AUR62035217-RA	CqBBX02	LTR	CCGAAA	cis-acting element involved in low-temperature responsiveness	Stress responsiveness
AUR62035217-RA	CqBBX02	LTR	CCGAAA	cis-acting element involved in low-temperature responsiveness	Stress responsiveness
AUR62035217-RA	CqBBX02	MBS	CAACTG	MYB binding site involved in drought-inducibility	Stress responsiveness
AUR62035221-RA	CqBBX03	ARE	AAACCA	cis-acting regulatory element essential for the anaerobic induction	Stress responsiveness
AUR62035221-RA	CqBBX03	ARE	AAACCA	cis-acting regulatory element essential for the anaerobic induction	Stress responsiveness
AUR62035221-RA	CqBBX03	LTR	CCGAAA	cis-acting element involved in low-temperature responsiveness	Stress responsiveness
AUR62041089-RA	CqBBX04	ARE	AAACCA	cis-acting regulatory element essential for the anaerobic induction	Stress responsiveness
AUR62041089-RA	CqBBX04	ARE	AAACCA	cis-acting regulatory element essential for the anaerobic induction	Stress responsiveness
AUR62002328-RA	CqBBX05	ARE	AAACCA	cis-acting regulatory element essential for the anaerobic induction	Stress responsiveness
AUR62002328-RA	CqBBX05	LTR	CCGAAA	cis-acting element involved in low-temperature responsiveness	Stress responsiveness
AUR62002328-RA	CqBBX05	LTR	CCGAAA	cis-acting element involved in low-temperature responsiveness	Stress responsiveness
AUR62002328-RA	CqBBX05	LTR	CCGAAA	cis-acting element involved in low-temperature responsiveness	Stress responsiveness
AUR62002328-RA	CqBBX05	LTR	CCGAAA	cis-acting element involved in low-temperature responsiveness	Stress responsiveness
AUR62002328-RA	CqBBX05	LTR	CCGAAA	cis-acting element involved in low-temperature responsiveness	Stress responsiveness
AUR62002328-RA	CqBBX05	TC-rich repeats	ATTCTCTAAC	cis-acting element involved in defense and stress responsiveness	Stress responsiveness
AUR62002328-RA	CqBBX05	TC-rich repeats	ATTCTCTAAC	cis-acting element involved in defense and stress responsiveness	Stress responsiveness
AUR62019649-RA	CqBBX06	ARE	AAACCA	cis-acting regulatory element essential for the anaerobic induction	Stress responsiveness
AUR62019649-RA	CqBBX06	ARE	AAACCA	cis-acting regulatory element essential for the anaerobic induction	Stress responsiveness
AUR62019649-RA	CqBBX06	ARE	AAACCA	cis-acting regulatory element essential for the anaerobic induction	Stress responsiveness
AUR62019649-RA	CqBBX06	ARE	AAACCA	cis-acting regulatory element essential for the anaerobic induction	Stress responsiveness
AUR62019649-RA	CqBBX06	LTR	CCGAAA	cis-acting element involved in low-temperature responsiveness	Stress responsiveness
AUR62019649-RA	CqBBX06	LTR	CCGAAA	cis-acting element involved in low-temperature responsiveness	Stress responsiveness
AUR62019649-RA	CqBBX06	TC-rich repeats	ATTCTCTAAC	cis-acting element involved in defense and stress responsiveness	Stress responsiveness
AUR62030805-RA	CqBBX07	TC-rich repeats	ATTCTCTAAC	cis-acting element involved in defense and stress responsiveness	Stress responsiveness
AUR62030805-RA	CqBBX07	TC-rich repeats	GTTTTCTTAC	cis-acting element involved in defense and stress responsiveness	Stress responsiveness
AUR62040293-RA	CqBBX08	ARE	AAACCA	cis-acting regulatory element essential for the anaerobic induction	Stress responsiveness
AUR62040293-RA	CqBBX08	ARE	AAACCA	cis-acting regulatory element essential for the anaerobic induction	Stress responsiveness
AUR62037849-RA	CqBBX09	ARE	AAACCA	cis-acting regulatory element essential for the anaerobic induction	Stress responsiveness
AUR62037849-RA	CqBBX09	ARE	AAACCA	cis-acting regulatory element essential for the anaerobic induction	Stress responsiveness
AUR62037849-RA	CqBBX09	LTR	CCGAAA	cis-acting element involved in low-temperature responsiveness	Stress responsiveness
AUR62037849-RA	CqBBX09	TC-rich repeats	GTTTTCTTAC	cis-acting element involved in defense and stress responsiveness	Stress responsiveness
AUR62009440-RA	CqBBX10	ARE	AAACCA	cis-acting regulatory element essential for the anaerobic induction	Stress responsiveness
AUR62009440-RA	CqBBX10	DRE	TACCGACAT	cis-acting element involved in dehydration, low-temp, salt stresses	Stress responsiveness
AUR62009440-RA	CqBBX10	LTR	CCGAAA	cis-acting element involved in low-temperature responsiveness	Stress responsiveness
AUR62009440-RA	CqBBX10	MBS	CAACTG	MYB binding site involved in drought-inducibility	Stress responsiveness
AUR62009440-RA	CqBBX10	TC-rich repeats	GTTTTCTTAC	cis-acting element involved in defense and stress responsiveness	Stress responsiveness
AUR62009440-RA	CqBBX10	TC-rich repeats	ATTCTCTAAC	cis-acting element involved in defense and stress responsiveness	Stress responsiveness
AUR62023118-RA	CqBBX11	ARE	AAACCA	cis-acting regulatory element essential for the anaerobic induction	Stress responsiveness
AUR62023118-RA	CqBBX11	ARE	AAACCA	cis-acting regulatory element essential for the anaerobic induction	Stress responsiveness
AUR62023118-RA	CqBBX11	LTR	CCGAAA	cis-acting element involved in low-temperature responsiveness	Stress responsiveness
AUR62023118-RA	CqBBX11	TC-rich repeats	ATTCTCTAAC	cis-acting element involved in defense and stress responsiveness	Stress responsiveness
AUR62023118-RA	CqBBX11	TC-rich repeats	ATTCTCTAAC	cis-acting element involved in defense and stress responsiveness	Stress responsiveness
AUR62037140-RA	CqBBX12	MBS	CAACTG	MYB binding site involved in drought-inducibility	Stress responsiveness
AUR62037140-RA	CqBBX12	TC-rich repeats	ATTCTCTAAC	cis-acting element involved in defense and stress responsiveness	Stress responsiveness
AUR62034563-RA	CqBBX13	TC-rich repeats	GTTTTCTTAC	cis-acting element involved in defense and stress responsiveness	Stress responsiveness
AUR62034638-RA	CqBBX14	TC-rich repeats	ATTCTCTAAC	cis-acting element involved in defense and stress responsiveness	Stress responsiveness
AUR62020307-RA	CqBBX15	ARE	AAACCA	cis-acting regulatory element essential for the anaerobic induction	Stress responsiveness
AUR62020307-RA	CqBBX15	ARE	AAACCA	cis-acting regulatory element essential for the anaerobic induction	Stress responsiveness
AUR62020307-RA	CqBBX15	ARE	AAACCA	cis-acting regulatory element essential for the anaerobic induction	Stress responsiveness
AUR62002867-RA	CqBBX16	ARE	AAACCA	cis-acting regulatory element essential for the anaerobic induction	Stress responsiveness
AUR62002867-RA	CqBBX16	ARE	AAACCA	cis-acting regulatory element essential for the anaerobic induction	Stress responsiveness
AUR62002867-RA	CqBBX16	ARE	AAACCA	cis-acting regulatory element essential for the anaerobic induction	Stress responsiveness
AUR62002867-RA	CqBBX16	ARE	AAACCA	cis-acting regulatory element essential for the anaerobic induction	Stress responsiveness
AUR62002867-RA	CqBBX16	ARE	AAACCA	cis-acting regulatory element essential for the anaerobic induction	Stress responsiveness
AUR62002793-RA	CqBBX17	ARE	AAACCA	cis-acting regulatory element essential for the anaerobic induction	Stress responsiveness
AUR62014436-RA	CqBBX18	ARE	AAACCA	cis-acting regulatory element essential for the anaerobic induction	Stress responsiveness
AUR62039579-RA	CqBBX19	ARE	AAACCA	cis-acting regulatory element essential for the anaerobic induction	Stress responsiveness
AUR62039579-RA	CqBBX19	LTR	CCGAAA	cis-acting element involved in low-temperature responsiveness	Stress responsiveness
AUR62016801-RA	CqBBX20	LTR	CCGAAA	cis-acting element involved in low-temperature responsiveness	Stress responsiveness
AUR62016801-RA	CqBBX20	LTR	CCGAAA	cis-acting element involved in low-temperature responsiveness	Stress responsiveness
AUR62016828-RA	CqBBX21	ARE	AAACCA	cis-acting regulatory element essential for the anaerobic induction	Stress responsiveness
AUR62016828-RA	CqBBX21	LTR	CCGAAA	cis-acting element involved in low-temperature responsiveness	Stress responsiveness
AUR62014102-RA	CqBBX22	ARE	AAACCA	cis-acting regulatory element essential for the anaerobic induction	Stress responsiveness
AUR62014102-RA	CqBBX22	ARE	AAACCA	cis-acting regulatory element essential for the anaerobic induction	Stress responsiveness
AUR62041163-RA	CqBBX23	MBS	CAACTG	MYB binding site involved in drought-inducibility	Stress responsiveness
AUR62041163-RA	CqBBX23	TC-rich repeats	ATTCTCTAAC	cis-acting element involved in defense and stress responsiveness	Stress responsiveness
AUR62025058-RA	CqBBX24	ARE	AAACCA	cis-acting regulatory element essential for the anaerobic induction	Stress responsiveness
AUR62025058-RA	CqBBX24	ARE	AAACCA	cis-acting regulatory element essential for the anaerobic induction	Stress responsiveness
AUR62025058-RA	CqBBX24	ARE	AAACCA	cis-acting regulatory element essential for the anaerobic induction	Stress responsiveness
AUR62025058-RA	CqBBX24	LTR	CCGAAA	cis-acting element involved in low-temperature responsiveness	Stress responsiveness
AUR62025058-RA	CqBBX24	TC-rich repeats	ATTCTCTAAC	cis-acting element involved in defense and stress responsiveness	Stress responsiveness
AUR62039984-RA	CqBBX25	ARE	AAACCA	cis-acting regulatory element essential for the anaerobic induction	Stress responsiveness
AUR62039984-RA	CqBBX25	ARE	AAACCA	cis-acting regulatory element essential for the anaerobic induction	Stress responsiveness
AUR62039984-RA	CqBBX25	TC-rich repeats	GTTTTCTTAC	cis-acting element involved in defense and stress responsiveness	Stress responsiveness
AUR62001354-RA	CqBBX26	ARE	AAACCA	cis-acting regulatory element essential for the anaerobic induction	Stress responsiveness
AUR62001354-RA	CqBBX26	TC-rich repeats	GTTTTCTTAC	cis-acting element involved in defense and stress responsiveness	Stress responsiveness
AUR62008578-RA	CqBBX27	ARE	AAACCA	cis-acting regulatory element essential for the anaerobic induction	Stress responsiveness
AUR62008578-RA	CqBBX27	ARE	AAACCA	cis-acting regulatory element essential for the anaerobic induction	Stress responsiveness
AUR62008578-RA	CqBBX27	ARE	AAACCA	cis-acting regulatory element essential for the anaerobic induction	Stress responsiveness
AUR62025650-RA	CqBBX28	ARE	AAACCA	cis-acting regulatory element essential for the anaerobic induction	Stress responsiveness
AUR62025650-RA	CqBBX28	ARE	AAACCA	cis-acting regulatory element essential for the anaerobic induction	Stress responsiveness
AUR62025650-RA	CqBBX28	ARE	AAACCA	cis-acting regulatory element essential for the anaerobic induction	Stress responsiveness
AUR62030486-RA	CqBBX29	ARE	AAACCA	cis-acting regulatory element essential for the anaerobic induction	Stress responsiveness
AUR62030486-RA	CqBBX29	MBS	CAACTG	MYB binding site involved in drought-inducibility	Stress responsiveness
AUR62030486-RA	CqBBX29	MBS	CAACTG	MYB binding site involved in drought-inducibility	Stress responsiveness
AUR62030486-RA	CqBBX29	MBS	CAACTG	MYB binding site involved in drought-inducibility	Stress responsiveness
AUR62010390-RA	CqBBX31	ARE	AAACCA	cis-acting regulatory element essential for the anaerobic induction	Stress responsiveness
AUR62010390-RA	CqBBX31	MBS	CAACTG	MYB binding site involved in drought-inducibility	Stress responsiveness
AUR62010390-RA	CqBBX31	MBS	CAACTG	MYB binding site involved in drought-inducibility	Stress responsiveness
AUR62010390-RA	CqBBX31	TC-rich repeats	GTTTTCTTAC	cis-acting element involved in defense and stress responsiveness	Stress responsiveness
