# Supplementary material for: Genome-wide identification and expression pattern analysis of quinoa BBX family
Source: PeerJ. 2022 Dec 5;10:e14463. doi: 10.7717/peerj.14463 (PMC9745916; doi:10.7717/peerj.14463)
Supplement: Table S4 [file peerj-10-14463-s005.xlsx]

## Sheet: Sheet1
Table S4 The values of 31 CqBBX genes in 13 tissues downloaded from NCBI
	Apical meristems	Flowers and immature seeds	Leaves petioles	Stems	Internode stems	Seedling	Inflorescences	Leaves	Dry seeds	Flowers of white sweet quinoa	Fruit of white sweet quinoa	Flowers of yellow bitter quinoa	Fruit of yellow bitter quinoa
CqBBX01	7	6	9	7	8	7	7	8	7	7	7	6	6
CqBBX02	7	6	7	7	7	6	7	6	4	7	4	6	3
CqBBX03	1	4	2	1	2	3	2	1	-4	4	-6	2	-2
CqBBX04	3	5	2	0	0	1	2	-2	1	5	1	4	1
CqBBX05	7	6	8	6	8	7	7	8	7	7	7	6	6
CqBBX06	4	5	4	3	2	3	3	1	4	4	4	4	4
CqBBX07	-1	0	0	-10	3	5	4	7	-6	6	-10	4	-4
CqBBX08	4	4	5	4	6	4	4	5	3	4	5	4	4
CqBBX09	3	5	3	1	1	2	3	0	2	5	2	4	1
CqBBX10	3	0	6	4	7	7	5	6	-1	3	0	2	1
CqBBX11	3	1	6	4	7	6	4	7	0	3	0	2	1
CqBBX12	3	4	2	2	2	2	3	1	1	3	1	3	1
CqBBX13	1	3	-10	-1	0	3	0	-5	-4	-1	-4	1	-10
CqBBX14	3	4	3	4	4	5	5	4	3	5	4	4	3
CqBBX15	8	7	8	8	8	7	8	7	3	8	2	7	3
CqBBX16	0	3	1	0	1	3	2	0	-3	4	0	2	-2
CqBBX17	2	2	0	0	3	2	3	2	1	3	2	1	1
CqBBX18	3	4	0	-1	2	3	2	-2	1	2	0	2	-1
CqBBX19	5	6	6	5	2	3	3	0	5	4	5	5	4
CqBBX20	-2	-10	0	-10	-3	1	-10	-4	-2	-2	1	-1	-1
CqBBX21	3	3	3	3	5	2	4	3	1	3	2	3	2
CqBBX22	2	3	2	2	3	3	2	3	-10	2	-4	1	-6
CqBBX23	5	4	5	2	5	5	4	4	0	3	4	4	2
CqBBX24	3	4	2	2	3	3	4	2	2	4	1	3	2
CqBBX25	3	3	5	4	6	4	5	5	5	5	5	4	4
CqBBX26	6	3	7	7	6	6	6	6	3	3	4	5	3
CqBBX27	4	4	4	4	4	5	4	4	4	5	4	4	4
CqBBX28	6	4	6	7	7	7	6	6	5	4	5	5	4
CqBBX29	2	2	6	0	5	6	5	8	-6	6	-10	4	-10
CqBBX30	-2	-1	0	0	0	3	1	0	0	-1	0	-3	-1
CqBBX31	3	2	4	3	5	2	3	3	1	2	2	2	1
The values of 31 CqBBX genes in 2 tissues and 5 tretments were downloaded from NCBI
	Root_CK	Root_dry	Root_heat	Root_low_P	Root_salt	Shoot_CK	Shoot_dry	Shoot_heat	Shoot_low_P	Shoot_salt
CqBBX01	3	2	0	2	3	4	6	5	5	5
CqBBX02	4	1	0	2	3	5	6	5	5	5
CqBBX03	1	0	-3	0	0	5	5	5	4	5
CqBBX04	2	3	2	2	1	4	5	4	3	4
CqBBX05	3	2	1	3	3	4	6	5	4	5
CqBBX06	3	3	3	3	2	3	3	3	3	3
CqBBX07	-3	-5	-10	-5	-4	1	5	3	-2	0
CqBBX08	3	2	2	3	2	4	4	3	3	3
CqBBX09	3	3	2	3	2	3	5	4	3	4
CqBBX10	2	1	1	1	2	3	1	1	1	2
CqBBX11	1	0	0	0	0	3	1	1	1	3
CqBBX12	3	3	3	3	2	3	3	3	2	3
CqBBX13	2	3	2	1	1	-1	-2	-2	-2	-5
CqBBX14	4	4	3	4	4	4	4	4	3	4
CqBBX15	4	-1	-1	2	2	6	7	6	5	6
CqBBX16	1	-2	-2	-1	-1	4	4	4	3	4
CqBBX17	-1	-1	-5	-3	0	2	3	4	1	2
CqBBX18	3	5	4	3	3	-1	2	0	1	-1
CqBBX19	3	2	2	2	2	4	4	4	4	5
CqBBX20	0	-1	-3	-2	1	1	-1	1	-2	1
CqBBX21	2	1	0	1	1	1	1	0	-1	0
CqBBX22	0	-2	-1	-1	-1	4	4	4	2	3
CqBBX23	-2	-10	-10	-3	-2	1	1	0	2	1
CqBBX24	3	4	3	3	3	3	3	3	2	3
CqBBX25	4	2	2	2	2	4	4	4	3	4
CqBBX26	4	3	2	4	4	1	1	-1	2	0
CqBBX27	4	3	3	4	4	4	4	4	3	3
CqBBX28	4	3	2	4	4	2	1	0	1	1
CqBBX29	-10	-10	-10	-5	-5	4	6	6	3	5
CqBBX30	0	0	-2	-2	0	2	0	2	0	1
CqBBX31	3	2	0	2	2	2	2	1	1	2
