# Supplementary material for: Genome-wide identification and expression pattern analysis of quinoa BBX family
Source: PeerJ. 2022 Dec 5;10:e14463. doi: 10.7717/peerj.14463 (PMC9745916; doi:10.7717/peerj.14463)
Supplement: Table S5 [file peerj-10-14463-s006.xlsx]

## Sheet: Sheet1
Table S5 The transcripts amounts of 13 genes by qRT-PCR
	20% PEG6000							4°C low temperature							200 mmol/L Nacl
	0h	3h	6h	9h	12h	24h	48h	0h	3h	6h	9h	12h	24h	48h	0h	3h	6h	9h	12h	24h	48h
CqBBX01	1	0.685112	0.589331	0.488994	0.500826	1.8014	1.09405	1	1.17679	0.231486	0.274975	0.352739	0.584083	0.886393	1	0.962041	0.125878	0.032836	0.0342176	0.453575	1.40195
CqBBX05	1	0.504003	0.305083	0.229124	0.565612	0.583401	0.246132	1	1.17742	1.21838	0.616358	0.339549	1.00739	1.1196	1	0.549755	0.305601	0.0348029	0.0179745	1.02206	0.562586
CqBBX06	1	1.54485	2.55299	2.55481	3.02688	3.69937	5.70696	1	2.393	2.39859	2.20613	1.32395	2.57941	1.95691	1	2.42137	3.34199	1.02794	0.293013	2.36312	0.948674
CqBBX13	1	8.36691	9.79238	7.48201	16.6511	16.3598	27.9694	1	0.149451	0.131702	0.276474	0.150976	0.618787	0.662948	1	0.49681	4.3652	0.984544	1.34888	3.80644	5.08526
CqBBX18	1	1.31401	3.73559	7.046	7.30926	13.2304	18.7409	1	0.897307	1.86698	3.82725	1.01879	0.538597	0.282942	1	1.06933	3.59524	1.78642	0.445706	2.06762	1.17133
CqBBX19	1	1.18264	3.00076	9.10869	3.9177	5.1818	17.9864	1	3.85559	2.10781	0.310824	0.189486	4.2192	1.22307	1	2.52974	2.39952	2.60356	0.337987	2.70328	1.23499
CqBBX20	1	2.90015	2.25719	1.06705	3.69051	1.00996	0.928165	1	2.2192	4.07242	7.97709	6.92741	3.56051	1.98227	1	3.10486	3.83727	2.74519	2.11529	0.812024	0.523344
CqBBX21	1	12.7092	8.11927	8.54926	14.8788	34.0106	4.23845	1	3.2175	0.990867	0.65543	1.35564	1.30164	0.791987	1	2.7588	12.7499	5.05425	1.06552	22.4745	17.3006
CqBBX23	1	1.83013	0.461742	0.44463	0.240624	1.69221	3.14491	1	3.3576	4.74821	1.96017	0.756554	2.1716	1.74169	1	0.930167	0.492209	0.191532	0.106125	3.35886	1.09383
CqBBX26	1	1.81109	2.12153	1.70802	1.85058	3.34538	3.10955	1	1.56658	0.998517	0.542979	0.421947	0.432629	1.07271	1	0.967589	0.87114	0.941386	1.54341	1.84845	2.0187
CqBBX28	1	3.50353	3.22801	3.28444	1.73171	24.385	12.7459	1	2.8732	1.35864	0.791987	0.382127	0.459774	0.199222	1	1.72878	0.876172	0.534228	0.486803	0.801972	4.11022
CqBBX30	1	0.193751	0.110048	0.211058	0.939628	0.739651	2.7016	1	1.69229	3.16476	1.94127	0.973144	0.381073	0.40976	1	1.74461	0.8238	0.407144	0.696584	0.64652	0.412075
CqBBX31	1	2.36674	4.80086	2.25672	2.18517	14.4782	3.58982	1	16.3251	5.19549	1.53069	6.80635	4.47109	2.53057	1	1.07387	3.44505	0.0688379	0.115831	0.257892	1.94727
